# Supplementary material for: Cytotoxicity Studies of Novel Combretastatin and Pterostilbene Derivatives
Source: Hindawi journal article supplement (doi:10.1155/2014/320895), 2014-01-01

## **Cytotoxicity studies of novel Combretastatin and Pterostilben derivatives**

**Joanna Jakubowska<sup>[a]</sup>, Justyna Mięka-Pietrasik<sup>[b]</sup> Krzysztof Książek<sup>[b]</sup> and Hanna Krawczyk <sup>\*,[a]</sup>**

[a]Department of Organic Chemistry, Faculty of ChemistryWarsaw University of Technology, Noakowskiego 3,00-664 Warsaw, Poland,

Fax: (+)48 22 628 27 41 ,E-mail: [hkraw@ch.pw.edu.pl](mailto:hkraw@ch.pw.edu.pl)

[b] Department of Pathophysiology, Laboratory of Gerontology, Poznań University of Medical Sciences. ul. Święcickiego 6, 60-781 Poznań, Poland

**Experimental.** All stilbenes (**1b-7b**) were prepared in our laboratory. Sodium azide was obtained from Sigma-Aldrich Corp.

The data for compounds (**1b**) and (**2b**) in [1].

**Compound (3b)**- stirred at 120 °C for 20 h, yield 82% (436 mg; 1.45 mmol), bright red powder, mp 137<sup>0</sup>C;

**Compound (4b)**- stirred at 120 °C for 20 h, yield 80% (436 mg; 1.36 mmol), dark red powder, mp 117<sup>0</sup>C ;

**Compound (5b)**- stirred at 120 °C for 20 h, yield 81% (436 mg; 1.51 mmol), dark orange powder, mp 105<sup>0</sup>C;

**Compound (6b)**- stirred at 120 °C for 20 h, yield 78% (436 mg; 1.28 mmol), yellow powder, mp 153<sup>0</sup>C.

**Compound (7b)**- stirred at 120 °C for 20 h, yield 75% (479 mg; 1.45 mmol), red powder, mp 144<sup>0</sup>C ;

### Mass Spectra

The measurement of mass spectra were carried out with ESI-TOF MS Mariner (Perseptive Biosystem).

The data for compounds (**1b**) and (**2b**) in [1].

HRMS of (**3b**)(ESI, MeOH/ CHCl<sub>3</sub>) 323.1008 calcd for C<sub>16</sub>H<sub>16</sub>N<sub>2</sub>O<sub>4</sub>Na (*M*<sup>+</sup>+Na) found 323.0996;

HRMS of (**4b**)(ESI, MeOH/ CHCl<sub>3</sub>) 323.1008 calcd for C<sub>16</sub>H<sub>16</sub>N<sub>2</sub>O<sub>4</sub>Na (*M*<sup>+</sup>+Na) found 323.0996;

HRMS of (**5b**)(ESI, MeOH/ CHCl<sub>3</sub>) 323.1008 calcd for C<sub>16</sub>H<sub>16</sub>N<sub>2</sub>O<sub>4</sub>Na (*M*<sup>+</sup>+Na) found 323.1007;

HRMS of (**6b**)(ESI, MeOH/ CHCl<sub>3</sub>) 323.1008 calcd for C<sub>16</sub>H<sub>16</sub>N<sub>2</sub>O<sub>4</sub>Na (*M*<sup>+</sup>+Na) found 323.1005;

HRMS of (**7b**)(ESI, MeOH/ CHCl<sub>3</sub>) 353.1113 calcd for C<sub>17</sub>H<sub>18</sub>N<sub>2</sub>O<sub>5</sub>Na (*M*<sup>+</sup>+Na) found 353.1111.

### IR spectra

The IR spectra were recorded at ambient temperature on a Perkin Elmer System 2000, using the technique of Attenuated Total Reflectance (ATR).

The data for compounds (**1b**) and (**2b**) in [1].

IR of (**3b**) v(cm<sup>-1</sup>): 3439.8, 3351.6, 2959.1, 2836.7, 1639.0, 1583.4, 1505.9, 1463.8, 1334.4, 1136.1 (the whole spectrum is on the following pages).

IR of (**4b**) v(cm<sup>-1</sup>): 3496.9, 3403.3, 2932.4, 2835.0, 1604.8, 1575.6, 1500.6, 1447.1, 1339.8, 1156.6(the whole spectrum is on the following pages)

IR of (**5b**) v(cm<sup>-1</sup>): 3473.8, 3383.9, 2936.5, 2834.0, 1639.9, 1580.0, 1495.1, 1425.5, 1318.3, 1215.4 (the whole spectrum is on the following pages).

IR of (**6b**)v(cm<sup>-1</sup>): 3417.8, 3343.1, 2925.7, 2844.0, 1644.1, 1593.4, 1520.1, 1455.4, 1341.4, 1148.8 (the whole spectrum is on the following pages).

IR of (**7b**) v(cm<sup>-1</sup>): 3432.8, 3352.9, 2942.9, 2839.0, 1639.8, 1581.9, 1505.2, 1420.5, 1326.3, 1122.5 (the whole spectrum is on the following pages).

### **Experimental NMR**

All the spectra were recorded using a Varian VNMRS spectrometer operating at 11.7 T magnetic field. Measurements were performed for ca. 1.0M solutions of all the compounds in DMSO-d<sub>6</sub>. The residual signals of DMSO-d<sub>6</sub> (2.54ppm) in <sup>1</sup>H NMR and the DMSO-d<sub>6</sub> signal (40.45 ppm) in <sup>13</sup>C NMR spectra were used as the chemical shift references. All the proton spectra were recorded using the standard spectrometer software and parameters set: acquisition time 3 s, pulse angle 30°. The standard measurement parameter set for <sup>13</sup>C spectra was: pulse width 7 μs (the 90° pulse width was 12.5 μs), acquisition time 1 s, spectral width 200 ppm, 1000 scans of 32 K data point were accumulated and after zero-filling to 64 K; and the FID signals were subjected to Fourier transformation after applying a 1 Hz line broadening. The <sup>1</sup>H–<sup>13</sup>Cgs-HSQC and <sup>1</sup>H–<sup>13</sup>Cgs-HMBC spectra were also recorded using the standard Varian software.

**Table 1.** Experimental  $^1\text{H}$  chemical shifts and coupling constants of **(1b)**-(**7b**) in DMSO- $\text{d}_6$ .

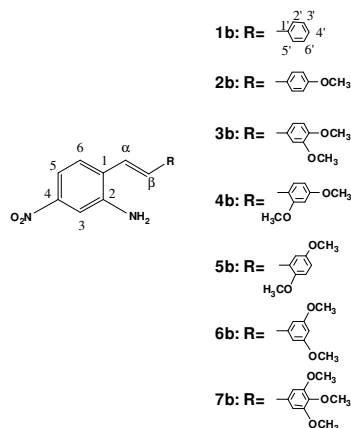

| Compound    | $^1\text{H}$ NMR [ppm] and J [Hz] |                          |                           |         |          |                                     |                            |                            |                                               |                             |                            |
|-------------|-----------------------------------|--------------------------|---------------------------|---------|----------|-------------------------------------|----------------------------|----------------------------|-----------------------------------------------|-----------------------------|----------------------------|
|             | 2(NH <sub>2</sub> )               | 3                        | 5                         | 6       | $\alpha$ | $\beta$                             | 2'                         | 3'                         | 4'                                            | 5'                          | 6'                         |
| <b>(1b)</b> | 6.10;bs                           | 7.58; d<br>$J_{3,5}=2.5$ | 7.40; dd<br>$J_{5,6}=8.5$ | 7.72; d | 7.28; AB | 7.48; AB $J_{\alpha,\beta}=16.3$    | 7.73; d                    | 7.43; d<br>$J_{2',3'}=7.5$ | 7.33; t<br>$J_{3',4'}=7.5$<br>$J_{4',5'}=7.5$ | 7.42; d<br>$J_{4',5'}=7.5$  | 7.73;d<br>$J_{5',6'}=7.5$  |
| <b>(2b)</b> | 6.02;bs                           | 7.55<br>$J_{3,5}=2.0$    | 7.40; dd<br>$J_{5,6}=8.5$ | 7.69; d | 7.24; AB | 7.32 AB<br>$J_{\alpha,\beta}=16.0$  | 7.67; d                    | 7.00; d<br>$J_{2',3'}=8.5$ | 3.83; s(CH <sub>3</sub> )                     | 7.00; d                     | 7.67; d<br>$J_{5',6'}=8.5$ |
| <b>(3b)</b> | 6.07;bs                           | 7.56; d<br>$J_{3,5}=2.5$ | 7.40; dd<br>$J_{5,6}=8.5$ | 7.69; d | 7.32; AB | 7.22; AB<br>$J_{\alpha,\beta}=16.0$ | 7.41; d<br>$J_{2',6'}=2.0$ | 3.88;s(CH <sub>3</sub> )   | 3.82; s(CH <sub>3</sub> )                     | 7.01; d<br>$J_{5',6'}=8.5$  | 7.21; dd                   |
| <b>(4b)</b> | 5.96; bs                          | 7.56; d<br>$J_{3,5}=2.5$ | 7.41; dd<br>$J_{5,6}=8.5$ | 7.60; d | 7.26; AB | 7.38; AB<br>$J_{\alpha,\beta}=16.0$ | 3.89; s(CH <sub>3</sub> )  | 6.64; d<br>$J_{3',5'}=2.0$ | 3.84; s(CH <sub>3</sub> )                     | 6.63; dd<br>$J_{5',6'}=9.5$ | 7.79; d                    |
| <b>(5b)</b> | 6.08;bs                           | 7.57;d<br>$J_{3,5}=2.5$  | 7.41<br>$J_{5,6}=8.5$     | 7.64; d | 7.41; AB | 7.43; AB<br>$J_{\alpha,\beta}=16.0$ | 3.84;s(CH <sub>3</sub> )   | 7.01<br>$J_{3',4'}=9.0$    | 6.92<br>$J_{4',6'}=3.0$                       | 3.82;s(CH <sub>3</sub> )    | 7.46; d                    |
| <b>(6b)</b> | 6.13;bs                           | 7.56;d<br>$J_{3,5}=2.5$  | 7.40<br>$J_{5,6}=8.5$     | 7.71; d | 7.45; AB | 7.22; AB<br>$J_{\alpha,\beta}=16.0$ | 6.93; d<br>$J_{2',4'}=2.5$ | 3.83;s(CH <sub>3</sub> )   | 6.49; t<br>$J_{4',6'}=2.5$                    | 3.83;s(CH <sub>3</sub> )    | 6.93; d                    |
| <b>(7b)</b> | 6.11; bs                          | 7.57; d<br>$J_{3,5}=2.5$ | 7.41<br>$J_{5,6}=8.5$     | 7.69; d | 7.38; AB | 7.23; AB<br>$J_{\alpha,\beta}=16.0$ | 7.06;s                     | 3.88;s(CH <sub>3</sub> )   | 3.73; s(CH <sub>3</sub> )                     | 3.88;s(CH <sub>3</sub> )    | 7.06;s                     |

**Table 2.** Experimental  $^{13}\text{C}$  chemical shifts of **(1b)**–**(7b)** in DMSO- $d_6$  (the residual signal 40.45ppm).

| Compound    | $^{13}\text{C}$ NMR [ppm] |        |        |        |        |        |          |         |        |        |        |        |        |        |                                                                         |
|-------------|---------------------------|--------|--------|--------|--------|--------|----------|---------|--------|--------|--------|--------|--------|--------|-------------------------------------------------------------------------|
|             | 1                         | 2      | 3      | 4      | 5      | 6      | $\alpha$ | $\beta$ | 1'     | 2'     | 3'     | 4'     | 5'     | 6'     | substituent                                                             |
| <b>(1b)</b> | 129.55                    | 148.07 | 110.03 | 148.14 | 111.48 | 127.16 | 123.43   | 132.21  | 138.03 | 127.93 | 129.59 | 128.96 | 129.59 | 127.93 | -                                                                       |
| <b>(2b)</b> | 128.87                    | 147.74 | 109.90 | 147.74 | 111.61 | 126.70 | 121.03   | 132.02  | 130.74 | 129.36 | 115.09 | 160.28 | 115.09 | 129.36 | 56.16 (C4'-OCH <sub>3</sub> )                                           |
| <b>(3b)</b> | 128.75                    | 147.70 | 109.84 | 147.72 | 111.57 | 126.61 | 121.00   | 132.38  | 130.94 | 110.43 | 149.86 | 150.10 | 112.59 | 121.83 | 56.52 (C3'-OCH <sub>3</sub> );<br>56.45 (C4'-OCH <sub>3</sub> )         |
| <b>(4b)</b> | 129.50                    | 147.63 | 109.85 | 147.64 | 111.81 | 126.56 | 121.06   | 126.32  | 119.33 | 158.78 | 99.16  | 161.78 | 106.75 | 128.41 | 56.59 (C2'-OCH <sub>3</sub> );<br>56.28 (C4'-OCH <sub>3</sub> )         |
| <b>(5b)</b> | 128.56                    | 147.99 | 109.91 | 148.05 | 111.59 | 127.00 | 123.68   | 125.96  | 127.07 | 151.93 | 113.56 | 115.56 | 154.27 | 112.38 | 57.03 (C2'-OCH <sub>3</sub> );<br>56.47 (C5'-OCH <sub>3</sub> )         |
| <b>(6b)</b> | 127.95                    | 148.06 | 109.97 | 148.15 | 111.39 | 127.11 | 123.73   | 132.24  | 139.95 | 105.97 | 161.55 | 101.15 | 161.55 | 105.97 | 56.19 (C3'-OCH <sub>3</sub> ;<br>C5'-OCH <sub>3</sub> )                 |
| <b>(7b)</b> | 128.28                    | 147.87 | 109.91 | 147.97 | 111.51 | 126.81 | 122.55   | 132.42  | 133.66 | 105.42 | 153.96 | 138.66 | 153.96 | 105.42 | 56.87 (C3',C5'-<br>OCH <sub>3</sub> ); 61.03<br>(C4'-OCH <sub>3</sub> ) |

### Computational aspects

The optimum ground-state geometry for **1a**, **3a-7a** and for **1b-7b** compounds were calculated using the density functional theory (DFT). In calculation the B3LYP functional and 6-311G 6-311++g (2d,p) basis set was employed and the continuum model (PCM; Gaussian 03W) [2,3] was used in order to simulate the effects of the solvent. All the calculations were performed on a server equipped with a 16 quad-core XEON (R) CPU E7310 processor operating at 1.60 GHz. The operating system was Open SUSE 10.3. The data for compounds (**2a**) in [1].

The calculated coordinates of (**1a**)( the part of calculated log file)

Standard orientation:

| Center<br>Number | Atomic<br>Number | Atomic<br>Type | Coordinates (Angstroms) |           |           |
|------------------|------------------|----------------|-------------------------|-----------|-----------|
|                  |                  |                | X                       | Y         | Z         |
| 1                | 6                | 0              | 5.303617                | 0.856801  | -0.193348 |
| 2                | 6                | 0              | 3.926301                | 0.711714  | -0.217677 |
| 3                | 6                | 0              | 3.332495                | -0.538558 | 0.028813  |
| 4                | 6                | 0              | 4.173651                | -1.630923 | 0.295690  |

|    |   |   |           |           |           |
|----|---|---|-----------|-----------|-----------|
| 5  | 6 | 0 | 5.554063  | -1.484003 | 0.321018  |
| 6  | 6 | 0 | 6.124113  | -0.238972 | 0.077623  |
| 7  | 6 | 0 | -0.990360 | -1.424789 | -0.227623 |
| 8  | 6 | 0 | -2.332700 | -1.727329 | -0.177505 |
| 9  | 6 | 0 | -3.254855 | -0.693165 | -0.030038 |
| 10 | 6 | 0 | -2.842523 | 0.621250  | 0.062178  |
| 11 | 6 | 0 | -1.487743 | 0.901203  | -0.020287 |
| 12 | 6 | 0 | -0.497097 | -0.103292 | -0.149584 |
| 13 | 6 | 0 | 1.892161  | -0.764213 | 0.015947  |
| 14 | 6 | 0 | 0.933324  | 0.168241  | -0.158500 |
| 15 | 7 | 0 | -1.156846 | 2.335420  | 0.054687  |
| 16 | 8 | 0 | -0.232524 | 2.762051  | -0.629763 |
| 17 | 8 | 0 | -1.850890 | 3.035188  | 0.784101  |
| 18 | 7 | 0 | -4.683840 | -0.995019 | 0.022837  |
| 19 | 8 | 0 | -5.469126 | -0.058909 | 0.147365  |
| 20 | 8 | 0 | -5.022621 | -2.172629 | -0.058945 |
| 21 | 1 | 0 | 5.744257  | 1.827977  | -0.385001 |
| 22 | 1 | 0 | 3.311055  | 1.575998  | -0.434358 |
| 23 | 1 | 0 | 3.732819  | -2.603998 | 0.483207  |
| 24 | 1 | 0 | 6.184089  | -2.340244 | 0.530396  |
| 25 | 1 | 0 | 7.200951  | -0.119979 | 0.093822  |
| 26 | 1 | 0 | -0.291108 | -2.239676 | -0.350606 |
| 27 | 1 | 0 | -2.674783 | -2.749132 | -0.257546 |
| 28 | 1 | 0 | -3.559852 | 1.418032  | 0.185513  |
| 29 | 1 | 0 | 1.608124  | -1.798323 | 0.183989  |
| 30 | 1 | 0 | 1.223860  | 1.197149  | -0.294394 |

Visualization of calculated geometry of (**1a**):

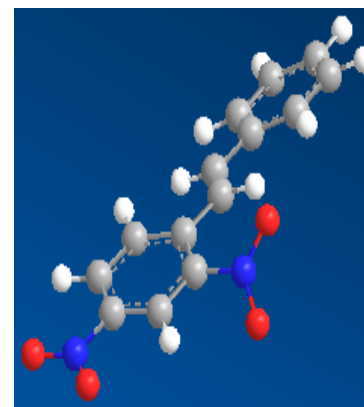

The calculated coordinates of (**3a**)( the part of calculated log file)

Standard orientation:

| Center<br>Number | Atomic<br>Number | Atomic<br>Type | Coordinates (Angstroms) |           |           |
|------------------|------------------|----------------|-------------------------|-----------|-----------|
|                  |                  |                | X                       | Y         | Z         |
| 1                | 6                | 0              | 3.846662                | 1.324327  | -0.366356 |
| 2                | 6                | 0              | 2.483416                | 1.081364  | -0.331414 |
| 3                | 6                | 0              | 1.978206                | -0.170551 | 0.046503  |
| 4                | 6                | 0              | 2.906319                | -1.175202 | 0.374902  |

|    |   |   |           |           |           |
|----|---|---|-----------|-----------|-----------|
| 5  | 6 | 0 | 4.268834  | -0.950906 | 0.342300  |
| 6  | 6 | 0 | 4.759027  | 0.320786  | -0.022942 |
| 7  | 6 | 0 | -2.265556 | -1.368250 | -0.165999 |
| 8  | 6 | 0 | -3.584540 | -1.761159 | -0.164056 |
| 9  | 6 | 0 | -4.582996 | -0.790677 | -0.074889 |
| 10 | 6 | 0 | -4.265037 | 0.550514  | 0.014233  |
| 11 | 6 | 0 | -2.929218 | 0.918358  | 0.044335  |
| 12 | 6 | 0 | -1.868508 | -0.016428 | -0.050123 |
| 13 | 6 | 0 | 0.561884  | -0.486184 | 0.112475  |
| 14 | 6 | 0 | -0.467694 | 0.359823  | -0.107089 |
| 15 | 8 | 0 | 5.122690  | -1.949339 | 0.741031  |
| 16 | 6 | 0 | 5.884945  | -2.564829 | -0.309872 |
| 17 | 7 | 0 | -2.686530 | 2.359692  | 0.212884  |
| 18 | 8 | 0 | -1.690094 | 2.716292  | 0.833825  |
| 19 | 8 | 0 | -3.515748 | 3.132836  | -0.257436 |
| 20 | 7 | 0 | -5.986187 | -1.189317 | -0.084130 |
| 21 | 8 | 0 | -6.840194 | -0.308684 | -0.008312 |
| 22 | 8 | 0 | -6.240115 | -2.388972 | -0.166910 |
| 23 | 8 | 0 | 6.101723  | 0.476461  | -0.001126 |
| 24 | 6 | 0 | 6.651557  | 1.747992  | -0.353656 |
| 25 | 1 | 0 | 4.198502  | 2.304806  | -0.655419 |
| 26 | 1 | 0 | 1.811954  | 1.885631  | -0.603816 |
| 27 | 1 | 0 | 2.562065  | -2.159686 | 0.672366  |
| 28 | 1 | 0 | -1.505337 | -2.126576 | -0.291629 |
| 29 | 1 | 0 | -3.853333 | -2.804435 | -0.250179 |
| 30 | 1 | 0 | -5.039606 | 1.299147  | 0.078379  |
| 31 | 1 | 0 | 0.347986  | -1.511396 | 0.399777  |
| 32 | 1 | 0 | -0.255535 | 1.397471  | -0.316562 |
| 33 | 1 | 0 | 6.501552  | -3.323503 | 0.168604  |
| 34 | 1 | 0 | 6.522635  | -1.835814 | -0.811667 |
| 35 | 1 | 0 | 5.217276  | -3.039537 | -1.034495 |
| 36 | 1 | 0 | 7.729122  | 1.635966  | -0.262444 |
| 37 | 1 | 0 | 6.396620  | 2.015116  | -1.382080 |
| 38 | 1 | 0 | 6.305228  | 2.527551  | 0.329191  |

Visualization of calculated geometry of (**3a**):

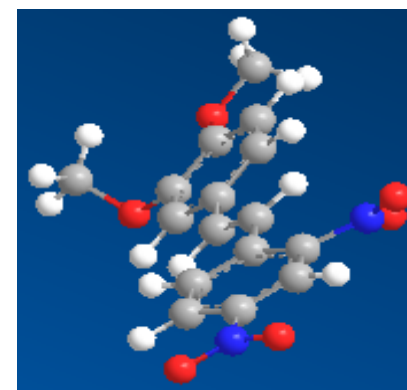

The calculated coordinates of (4a)( the part of calculated log file)

Standard orientation:

| Center<br>Number | Atomic<br>Number | Atomic<br>Type | Coordinates (Angstroms) |           |           |
|------------------|------------------|----------------|-------------------------|-----------|-----------|
|                  |                  |                | X                       | Y         | Z         |
| 1                | 6                | 0              | -4.097362               | -1.366608 | -0.280757 |
| 2                | 6                | 0              | -2.740088               | -1.105044 | -0.234817 |
| 3                | 6                | 0              | -2.218256               | 0.180731  | -0.035798 |
| 4                | 6                | 0              | -3.156123               | 1.242026  | 0.120222  |
| 5                | 6                | 0              | -4.519976               | 0.996220  | 0.075013  |
| 6                | 6                | 0              | -4.994490               | -0.304002 | -0.124049 |
| 7                | 6                | 0              | 2.055018                | 1.246809  | -0.209397 |
| 8                | 6                | 0              | 3.382801                | 1.600639  | -0.238323 |
| 9                | 6                | 0              | 4.356757                | 0.606463  | -0.120098 |
| 10               | 6                | 0              | 4.000320                | -0.719841 | 0.028283  |
| 11               | 6                | 0              | 2.654936                | -1.048102 | 0.088917  |
| 12               | 6                | 0              | 1.615869                | -0.088395 | -0.034858 |
| 13               | 6                | 0              | -0.802306               | 0.468555  | 0.012279  |
| 14               | 6                | 0              | 0.209799                | -0.429478 | -0.058433 |
| 15               | 7                | 0              | 2.379991                | -2.474618 | 0.317665  |
| 16               | 8                | 0              | 3.170207                | -3.287797 | -0.154073 |
| 17               | 8                | 0              | 1.398503                | -2.783611 | 0.987545  |
| 18               | 8                | 0              | -6.341275               | -0.430358 | -0.150613 |
| 19               | 6                | 0              | -6.907831               | -1.727126 | -0.354030 |
| 20               | 7                | 0              | 5.767447                | 0.963550  | -0.157703 |
| 21               | 8                | 0              | 6.599068                | 0.063261  | -0.051475 |
| 22               | 8                | 0              | 6.055531                | 2.151686  | -0.295203 |
| 23               | 8                | 0              | -2.633397               | 2.477426  | 0.311508  |
| 24               | 6                | 0              | -3.515532               | 3.589821  | 0.463908  |
| 25               | 1                | 0              | -4.442197               | -2.378186 | -0.437211 |
| 26               | 1                | 0              | -2.059286               | -1.936963 | -0.364361 |
| 27               | 1                | 0              | -5.246009               | 1.787685  | 0.190864  |
| 28               | 1                | 0              | 1.318734                | 2.025358  | -0.348997 |
| 29               | 1                | 0              | 3.680090                | 2.631540  | -0.368715 |
| 30               | 1                | 0              | 4.753927                | -1.487453 | 0.113055  |
| 31               | 1                | 0              | -0.569208               | 1.517522  | 0.141419  |
| 32               | 1                | 0              | -0.026433               | -1.480526 | -0.117063 |
| 33               | 1                | 0              | -7.985225               | -1.581376 | -0.342724 |
| 34               | 1                | 0              | -6.604310               | -2.140618 | -1.318613 |



|    |   |   |           |           |           |
|----|---|---|-----------|-----------|-----------|
| 35 | 1 | 0 | -6.622467 | -2.410111 | 0.449571  |
| 36 | 1 | 0 | -2.873333 | 4.457559  | 0.594102  |
| 37 | 1 | 0 | -4.150758 | 3.469137  | 1.344743  |
| 38 | 1 | 0 | -4.135912 | 3.723053  | -0.425680 |

Visualization of calculated geometry of (4a):

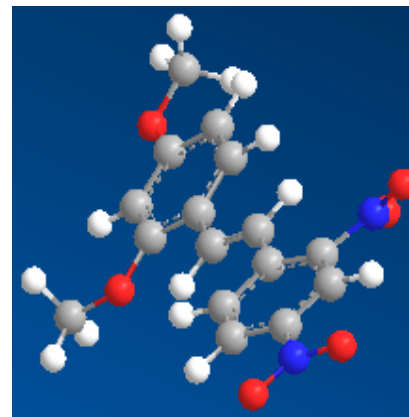

The calculated coordinates of (5a)( the part of calculated log file)

Standard orientation:

| Center<br>Number | Atomic<br>Number | Atomic<br>Type | Coordinates (Angstroms) |           |           |
|------------------|------------------|----------------|-------------------------|-----------|-----------|
|                  |                  |                | X                       | Y         | Z         |
| 1                | 6                | 0              | 4.293359                | -0.961203 | -0.075100 |
| 2                | 6                | 0              | 2.916163                | -0.783904 | -0.109572 |
| 3                | 6                | 0              | 2.330842                | 0.483314  | -0.023778 |
| 4                | 6                | 0              | 3.184943                | 1.610806  | 0.100065  |
| 5                | 6                | 0              | 4.563223                | 1.430258  | 0.133174  |
| 6                | 6                | 0              | 5.119880                | 0.156050  | 0.047248  |
| 7                | 6                | 0              | -2.006877               | 1.278393  | -0.284099 |
| 8                | 6                | 0              | -3.354765               | 1.553541  | -0.260864 |
| 9                | 6                | 0              | -4.258666               | 0.508296  | -0.071754 |
| 10               | 6                | 0              | -3.818204               | -0.791163 | 0.083541  |
| 11               | 6                | 0              | -2.457271               | -1.046711 | 0.025418  |
| 12               | 6                | 0              | -1.484940               | -0.027926 | -0.139123 |
| 13               | 6                | 0              | 0.892343                | 0.689943  | -0.063648 |
| 14               | 6                | 0              | -0.053080               | -0.274314 | -0.110351 |
| 15               | 8                | 0              | 2.578476                | 2.826889  | 0.183832  |
| 16               | 6                | 0              | 3.392097                | 3.993289  | 0.286896  |
| 17               | 8                | 0              | 4.736505                | -2.251069 | -0.169362 |
| 18               | 6                | 0              | 6.141661                | -2.483248 | -0.128927 |
| 19               | 7                | 0              | -2.097453               | -2.468590 | 0.156644  |
| 20               | 8                | 0              | -1.161872               | -2.900916 | -0.509599 |
| 21               | 8                | 0              | -2.779529               | -3.155412 | 0.910184  |
| 22               | 7                | 0              | -5.691498               | 0.781795  | -0.043301 |
| 23               | 8                | 0              | -6.459131               | -0.163450 | 0.122894  |
| 24               | 8                | 0              | -6.054629               | 1.947118  | -0.185791 |
| 25               | 1                | 0              | 2.299088                | -1.666965 | -0.212566 |
| 26               | 1                | 0              | 5.228185                | 2.276820  | 0.227641  |
| 27               | 1                | 0              | 6.196155                | 0.057898  | 0.076049  |
| 28               | 1                | 0              | -1.324320               | 2.102802  | -0.431085 |

|    |   |   |           |           |           |
|----|---|---|-----------|-----------|-----------|
| 29 | 1 | 0 | -3.717402 | 2.563845  | -0.386675 |
| 30 | 1 | 0 | -4.519872 | -1.597358 | 0.234329  |
| 31 | 1 | 0 | 0.597004  | 1.730307  | -0.042115 |
| 32 | 1 | 0 | 0.250176  | -1.308823 | -0.109806 |
| 33 | 1 | 0 | 2.700662  | 4.831569  | 0.330855  |
| 34 | 1 | 0 | 4.040765  | 4.100238  | -0.586599 |
| 35 | 1 | 0 | 3.998419  | 3.972492  | 1.196326  |
| 36 | 1 | 0 | 6.267280  | -3.560475 | -0.211807 |
| 37 | 1 | 0 | 6.649692  | -1.993824 | -0.964893 |
| 38 | 1 | 0 | 6.574021  | -2.138743 | 0.814931  |

Visualization of calculated geometry of (5a):

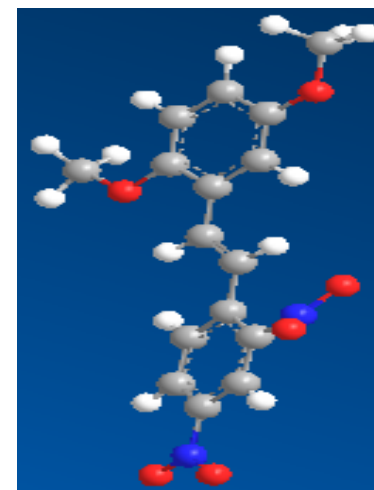

The calculated coordinates of (6a)( the part of calculated log file)

Standard orientation:

| Center<br>Number | Atomic<br>Number | Atomic<br>Type | Coordinates (Angstroms) |           |           |
|------------------|------------------|----------------|-------------------------|-----------|-----------|
|                  |                  |                | X                       | Y         | Z         |
| 1                | 6                | 0              | 3.988119                | 0.949302  | -0.382115 |
| 2                | 6                | 0              | 2.607645                | 0.788115  | -0.365249 |
| 3                | 6                | 0              | 2.055873                | -0.455517 | -0.033123 |
| 4                | 6                | 0              | 2.904275                | -1.525850 | 0.272572  |
| 5                | 6                | 0              | 4.286548                | -1.353208 | 0.253554  |
| 6                | 6                | 0              | 4.843507                | -0.115393 | -0.072390 |
| 7                | 6                | 0              | -2.247460               | -1.391043 | -0.414998 |
| 8                | 6                | 0              | -3.589025               | -1.709535 | -0.440635 |
| 9                | 6                | 0              | -4.527798               | -0.716461 | -0.165566 |
| 10               | 6                | 0              | -4.137861               | 0.574819  | 0.140504  |
| 11               | 6                | 0              | -2.782834               | 0.856345  | 0.192145  |
| 12               | 6                | 0              | -1.781912               | -0.100702 | -0.090722 |
| 13               | 6                | 0              | 0.614805                | -0.701600 | 0.014943  |
| 14               | 6                | 0              | -0.359325               | 0.214641  | -0.134705 |
| 15               | 8                | 0              | 4.434389                | 2.194318  | -0.717602 |
| 16               | 6                | 0              | 5.841157                | 2.437975  | -0.746468 |
| 17               | 7                | 0              | -5.950301               | -1.034099 | -0.205081 |
| 18               | 8                | 0              | -6.755512               | -0.138771 | 0.042894  |
| 19               | 8                | 0              | -6.277003               | -2.185222 | -0.486631 |
| 20               | 8                | 0              | 5.026161                | -2.454767 | 0.569084  |
| 21               | 6                | 0              | 6.450140                | -2.348490 | 0.567005  |

|    |   |   |           |           |           |
|----|---|---|-----------|-----------|-----------|
| 22 | 7 | 0 | -2.439742 | 2.226526  | 0.596712  |
| 23 | 8 | 0 | -1.438619 | 2.396530  | 1.285370  |
| 24 | 8 | 0 | -3.191680 | 3.130993  | 0.245173  |
| 25 | 1 | 0 | 1.988896  | 1.640081  | -0.624466 |
| 26 | 1 | 0 | 2.495597  | -2.498458 | 0.529920  |
| 27 | 1 | 0 | 5.912663  | 0.018808  | -0.088611 |
| 28 | 1 | 0 | -1.527673 | -2.156905 | -0.684435 |
| 29 | 1 | 0 | -3.910591 | -2.713679 | -0.692168 |
| 30 | 1 | 0 | -4.869056 | 1.342619  | 0.359024  |
| 31 | 1 | 0 | 0.342391  | -1.733827 | 0.228960  |
| 32 | 1 | 0 | -0.096949 | 1.254381  | -0.281549 |
| 33 | 1 | 0 | 5.953344  | 3.482078  | -1.030351 |
| 34 | 1 | 0 | 6.290277  | 2.278842  | 0.237611  |
| 35 | 1 | 0 | 6.337261  | 1.805488  | -1.487681 |
| 36 | 1 | 0 | 6.819875  | -3.332621 | 0.846329  |
| 37 | 1 | 0 | 6.791907  | -1.610473 | 1.297750  |
| 38 | 1 | 0 | 6.825348  | -2.088355 | -0.426578 |

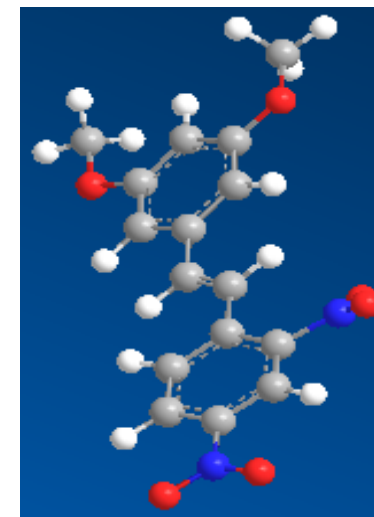

Visualization of calculated geometry of (6a):

The calculated coordinates of (7a)( the part of calculated log file)

Standard orientation:

| Center<br>Number | Atomic<br>Number | Atomic<br>Type | Coordinates (Angstroms) |           |           |
|------------------|------------------|----------------|-------------------------|-----------|-----------|
|                  |                  |                | X                       | Y         | Z         |
| 1                | 6                | 0              | 3.558551                | 0.918697  | -0.336628 |
| 2                | 6                | 0              | 2.182261                | 0.748763  | -0.298955 |
| 3                | 6                | 0              | 1.626872                | -0.503571 | 0.019618  |
| 4                | 6                | 0              | 2.481845                | -1.576944 | 0.284646  |
| 5                | 6                | 0              | 3.862713                | -1.413650 | 0.250389  |
| 6                | 6                | 0              | 4.416527                | -0.167583 | -0.048099 |
| 7                | 6                | 0              | -2.675182               | -1.463046 | -0.243576 |
| 8                | 6                | 0              | -4.012963               | -1.790396 | -0.244057 |
| 9                | 6                | 0              | -4.958307               | -0.780505 | -0.071536 |
| 10               | 6                | 0              | -4.573277               | 0.534597  | 0.100960  |
| 11               | 6                | 0              | -3.220141               | 0.833249  | 0.130155  |
| 12               | 6                | 0              | -2.211139               | -0.144459 | -0.042950 |
| 13               | 6                | 0              | 0.191544                | -0.744457 | 0.080947  |

|    |   |   |           |           |           |
|----|---|---|-----------|-----------|-----------|
| 14 | 6 | 0 | -0.790260 | 0.162275  | -0.096106 |
| 15 | 8 | 0 | 4.663046  | -2.477642 | 0.582878  |
| 16 | 6 | 0 | 5.400639  | -3.058478 | -0.504934 |
| 17 | 7 | 0 | -2.900874 | 2.247707  | 0.385197  |
| 18 | 8 | 0 | -1.870397 | 2.513120  | 0.995571  |
| 19 | 8 | 0 | -3.703088 | 3.088620  | -0.008020 |
| 20 | 8 | 0 | 5.773017  | -0.018696 | -0.115500 |
| 21 | 6 | 0 | 6.376025  | 0.611125  | 1.029220  |
| 22 | 8 | 0 | 4.185263  | 2.084516  | -0.637818 |
| 23 | 6 | 0 | 3.385722  | 3.233484  | -0.914797 |
| 24 | 7 | 0 | -6.381887 | -1.108995 | -0.081109 |
| 25 | 8 | 0 | -7.187944 | -0.195033 | 0.072990  |
| 26 | 8 | 0 | -6.695865 | -2.285394 | -0.242911 |
| 27 | 1 | 0 | 1.535476  | 1.583497  | -0.523083 |
| 28 | 1 | 0 | 2.082562  | -2.553543 | 0.531382  |
| 29 | 1 | 0 | -1.955160 | -2.246869 | -0.433556 |
| 30 | 1 | 0 | -4.335348 | -2.810825 | -0.395355 |
| 31 | 1 | 0 | -5.308546 | 1.314106  | 0.228489  |
| 32 | 1 | 0 | -0.073719 | -1.768285 | 0.326017  |
| 33 | 1 | 0 | -0.527324 | 1.195783  | -0.264426 |
| 34 | 1 | 0 | 5.976755  | -3.876273 | -0.075901 |
| 35 | 1 | 0 | 6.073649  | -2.327754 | -0.954766 |
| 36 | 1 | 0 | 4.714378  | -3.452228 | -1.260209 |
| 37 | 1 | 0 | 7.438829  | 0.685897  | 0.807086  |
| 38 | 1 | 0 | 2.748160  | 3.070607  | -1.787842 |
| 39 | 1 | 0 | 6.228400  | -0.003221 | 1.920730  |
| 40 | 1 | 0 | 4.087979  | 4.036932  | -1.124059 |
| 41 | 1 | 0 | 5.961748  | 1.608347  | 1.185320  |
| 42 | 1 | 0 | 2.770652  | 3.502303  | -0.051757 |

---

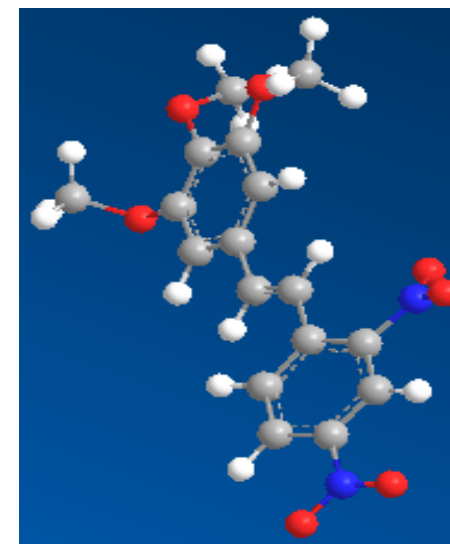

Visualization of calculated geometry of (**7a**):

# The calculated coordinates of **(1b)**( the part of calculated log file)

Standard orientation:

| Center<br>Number | Atomic<br>Number | Atomic<br>Type | Coordinates (Angstroms) |           |           |
|------------------|------------------|----------------|-------------------------|-----------|-----------|
|                  |                  |                | X                       | Y         | Z         |
| 1                | 6                | 0              | -5.203113               | 1.065976  | 0.100372  |
| 2                | 6                | 0              | -3.822770               | 0.940139  | 0.111510  |
| 3                | 6                | 0              | -3.213248               | -0.320598 | -0.007049 |
| 4                | 6                | 0              | -4.046526               | -1.443464 | -0.133945 |
| 5                | 6                | 0              | -5.429974               | -1.317235 | -0.144679 |
| 6                | 6                | 0              | -6.015128               | -0.061013 | -0.028055 |
| 7                | 6                | 0              | 1.175721                | -1.105143 | 0.147155  |
| 8                | 6                | 0              | 2.532872                | -1.350586 | 0.114226  |
| 9                | 6                | 0              | 3.387832                | -0.256833 | 0.007156  |
| 10               | 6                | 0              | 2.909864                | 1.041529  | -0.051787 |
| 11               | 6                | 0              | 1.534798                | 1.288620  | -0.017126 |
| 12               | 6                | 0              | 0.631880                | 0.189350  | 0.068572  |
| 13               | 6                | 0              | -1.766530               | -0.527413 | -0.004607 |
| 14               | 6                | 0              | -0.809437               | 0.417501  | 0.068000  |
| 15               | 7                | 0              | 1.092219                | 2.598459  | -0.140845 |
| 16               | 7                | 0              | 4.829242                | -0.478278 | -0.030455 |
| 17               | 8                | 0              | 5.570550                | 0.500132  | -0.130617 |
| 18               | 8                | 0              | 5.242504                | -1.636253 | 0.039046  |
| 19               | 1                | 0              | -5.651973               | 2.048092  | 0.193736  |
| 20               | 1                | 0              | -3.217364               | 1.832087  | 0.217139  |
| 21               | 1                | 0              | -3.596854               | -2.426331 | -0.225555 |
| 22               | 1                | 0              | -6.050488               | -2.200185 | -0.244126 |
| 23               | 1                | 0              | -7.093713               | 0.042728  | -0.035163 |
| 24               | 1                | 0              | 0.508460                | -1.951509 | 0.241022  |
| 25               | 1                | 0              | 2.928210                | -2.353321 | 0.173004  |
| 26               | 1                | 0              | 3.608200                | 1.864159  | -0.123882 |
| 27               | 1                | 0              | -1.471899               | -1.569583 | -0.081152 |
| 28               | 1                | 0              | -1.133770               | 1.450082  | 0.108357  |
| 29               | 1                | 0              | 0.220859                | 2.841412  | 0.307816  |
| 30               | 1                | 0              | 1.798223                | 3.305101  | 0.022002  |

Visualization of calculated geometry of **(1b)**:

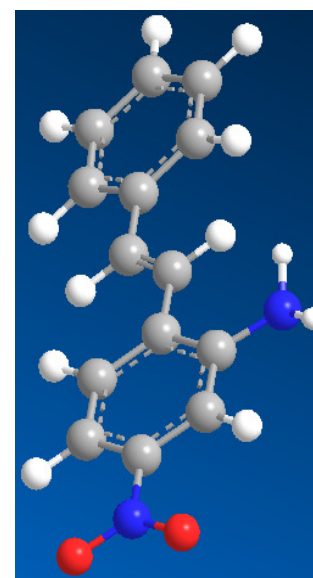

The calculated coordinates of **(2b)**( the part of calculated log file):

Standard orientation:

| Center<br>Number | Atomic<br>Number | Atomic<br>Type | Coordinates (Angstroms) |           |           |
|------------------|------------------|----------------|-------------------------|-----------|-----------|
|                  |                  |                | X                       | Y         | Z         |
| 1                | 6                | 0              | 4.351239                | 0.773658  | 0.392911  |
| 2                | 6                | 0              | 2.966936                | 0.688084  | 0.356211  |
| 3                | 6                | 0              | 2.310221                | -0.454863 | -0.120220 |
| 4                | 6                | 0              | 3.114016                | -1.524818 | -0.553723 |
| 5                | 6                | 0              | 4.493786                | -1.456134 | -0.523601 |
| 6                | 6                | 0              | 5.127086                | -0.302661 | -0.050682 |
| 7                | 6                | 0              | -2.087890               | -1.103385 | 0.275835  |
| 8                | 6                | 0              | -3.455742               | -1.299014 | 0.292091  |
| 9                | 6                | 0              | -4.273860               | -0.193888 | 0.075921  |
| 10               | 6                | 0              | -3.753233               | 1.069461  | -0.167390 |
| 11               | 6                | 0              | -2.372186               | 1.260659  | -0.194928 |
| 12               | 6                | 0              | -1.508934               | 0.154372  | 0.042828  |
| 13               | 6                | 0              | 0.859982                | -0.590948 | -0.185299 |
| 14               | 6                | 0              | -0.064409               | 0.353999  | 0.074919  |
| 15               | 7                | 0              | -1.855569               | 2.533224  | -0.408141 |
| 16               | 7                | 0              | -5.721269               | -0.363527 | 0.099862  |
| 17               | 8                | 0              | -6.431181               | 0.627901  | -0.077319 |
| 18               | 8                | 0              | -6.174450               | -1.492531 | 0.294893  |
| 19               | 8                | 0              | 6.486270                | -0.322056 | -0.055713 |
| 20               | 6                | 0              | 7.187231                | 0.828336  | 0.415261  |
| 21               | 1                | 0              | 4.813333                | 1.675093  | 0.770642  |
| 22               | 1                | 0              | 2.394330                | 1.534453  | 0.716167  |
| 23               | 1                | 0              | 2.638379                | -2.426718 | -0.923859 |
| 24               | 1                | 0              | 5.101884                | -2.286523 | -0.861801 |
| 25               | 1                | 0              | -1.440066               | -1.944992 | 0.485834  |
| 26               | 1                | 0              | -3.886411               | -2.269490 | 0.487229  |
| 27               | 1                | 0              | -4.424232               | 1.897868  | -0.348975 |
| 28               | 1                | 0              | 0.516077                | -1.572187 | -0.502549 |
| 29               | 1                | 0              | 0.266131                | 1.354196  | 0.336544  |
| 30               | 1                | 0              | -0.982968               | 2.583577  | -0.916157 |
| 31               | 1                | 0              | -2.521597               | 3.213359  | -0.752459 |
| 32               | 1                | 0              | 8.244038                | 0.590648  | 0.318538  |
| 33               | 1                | 0              | 6.954527                | 1.707953  | -0.190724 |
| 34               | 1                | 0              | 6.953876                | 1.031208  | 1.463812  |

-----Visualization of calculated geometry of **(2b)**:

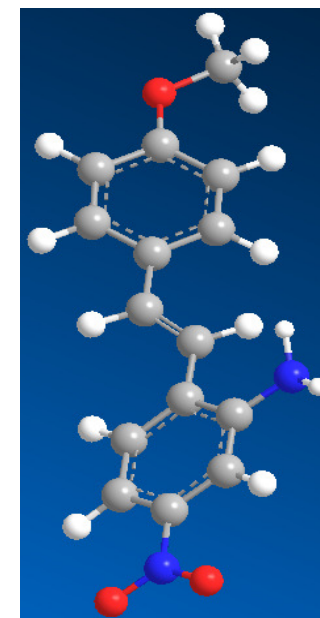

The calculated coordinates of **(3b)**( the part of calculated log file):

Standard orientation:

| Center<br>Number | Atomic<br>Number | Atomic<br>Type | Coordinates (Angstroms) |           |           |
|------------------|------------------|----------------|-------------------------|-----------|-----------|
|                  |                  |                | X                       | Y         | Z         |
| 1                | 6                | 0              | -3.663511               | 1.408286  | -0.455690 |
| 2                | 6                | 0              | -2.290899               | 1.217234  | -0.391057 |
| 3                | 6                | 0              | -1.743248               | -0.045804 | -0.135819 |
| 4                | 6                | 0              | -2.638248               | -1.112364 | 0.053873  |
| 5                | 6                | 0              | -4.009038               | -0.938823 | -0.003077 |
| 6                | 6                | 0              | -4.542400               | 0.337751  | -0.269941 |
| 7                | 6                | 0              | 2.610054                | -0.929201 | -0.565211 |
| 8                | 6                | 0              | 3.959984                | -1.223507 | -0.592681 |
| 9                | 6                | 0              | 4.843522                | -0.271256 | -0.093006 |
| 10               | 6                | 0              | 4.403787                | 0.934004  | 0.436034  |
| 11               | 6                | 0              | 3.039730                | 1.222239  | 0.473036  |
| 12               | 6                | 0              | 2.112241                | 0.277535  | -0.048738 |
| 13               | 6                | 0              | -0.310675               | -0.311108 | -0.060427 |
| 14               | 6                | 0              | 0.687978                | 0.592698  | -0.070274 |
| 15               | 7                | 0              | 2.604424                | 2.442413  | 0.975822  |
| 16               | 7                | 0              | 6.275415                | -0.544592 | -0.120360 |
| 17               | 8                | 0              | 7.045277                | 0.315375  | 0.310585  |
| 18               | 8                | 0              | 6.655188                | -1.625742 | -0.572487 |
| 19               | 8                | 0              | -5.894060               | 0.425881  | -0.345312 |
| 20               | 6                | 0              | -6.479281               | 1.701758  | -0.605319 |
| 21               | 8                | 0              | -4.827901               | -2.035563 | 0.128233  |
| 22               | 6                | 0              | -5.574111               | -2.101584 | 1.353088  |
| 23               | 1                | 0              | -4.046322               | 2.397097  | -0.667137 |
| 24               | 1                | 0              | -1.645824               | 2.070859  | -0.557962 |
| 25               | 1                | 0              | -2.263177               | -2.111005 | 0.249782  |
| 26               | 1                | 0              | 1.914174                | -1.640497 | -0.991391 |
| 27               | 1                | 0              | 4.329197                | -2.149331 | -1.007292 |
| 28               | 1                | 0              | 5.123234                | 1.638287  | 0.830787  |
| 29               | 1                | 0              | -0.052697               | -1.362778 | 0.033792  |
| 30               | 1                | 0              | 0.440077                | 1.649144  | -0.100430 |
| 31               | 1                | 0              | 1.716618                | 2.436558  | 1.459406  |
| 32               | 1                | 0              | 3.300788                | 2.966355  | 1.490892  |
| 33               | 1                | 0              | -7.553872               | 1.535468  | -0.616879 |
| 34               | 1                | 0              | -6.228449               | 2.418131  | 0.181247  |
| 35               | 1                | 0              | -6.159923               | 2.091693  | -1.575189 |

|    |   |   |           |           |          |
|----|---|---|-----------|-----------|----------|
| 36 | 1 | 0 | -6.158192 | -3.018934 | 1.303027 |
| 37 | 1 | 0 | -6.242544 | -1.245224 | 1.452540 |
| 38 | 1 | 0 | -4.895308 | -2.147316 | 2.209679 |

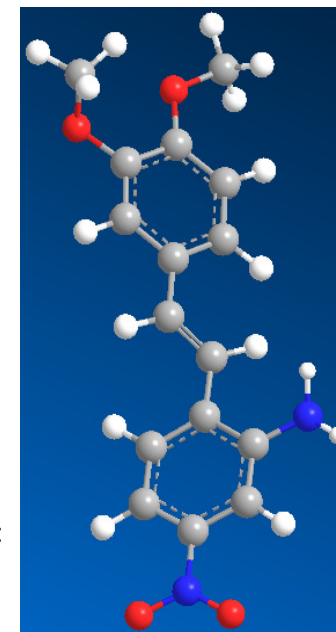

Visualization of calculated geometry of **(3b)**:

The calculated coordinates of **(4b)**( the part of calculated log file):  
Standard orientation:

| Center<br>Number | Atomic<br>Number | Atomic<br>Type | Coordinates (Angstroms) |           |           |
|------------------|------------------|----------------|-------------------------|-----------|-----------|
|                  |                  |                | X                       | Y         | Z         |
| 1                | 6                | 0              | 3.940264                | -1.427643 | -0.471715 |
| 2                | 6                | 0              | 2.570685                | -1.206791 | -0.430035 |
| 3                | 6                | 0              | 2.009664                | 0.026982  | -0.089112 |
| 4                | 6                | 0              | 2.910993                | 1.083849  | 0.208444  |
| 5                | 6                | 0              | 4.283307                | 0.882509  | 0.169633  |
| 6                | 6                | 0              | 4.800955                | -0.372263 | -0.166700 |
| 7                | 6                | 0              | -2.346219               | 0.758324  | -0.655939 |
| 8                | 6                | 0              | -3.701787               | 1.016443  | -0.726149 |
| 9                | 6                | 0              | -4.572186               | 0.083527  | -0.169451 |
| 10               | 6                | 0              | -4.112672               | -1.068495 | 0.454582  |
| 11               | 6                | 0              | -2.743653               | -1.320508 | 0.532096  |
| 12               | 6                | 0              | -1.828129               | -0.393665 | -0.042077 |
| 13               | 6                | 0              | 0.574489                | 0.266213  | -0.049998 |
| 14               | 6                | 0              | -0.396973               | -0.668701 | -0.009177 |
| 15               | 7                | 0              | -2.289716               | -2.490495 | 1.130029  |
| 16               | 8                | 0              | 6.157526                | -0.457418 | -0.173231 |
| 17               | 6                | 0              | 6.759234                | -1.709789 | -0.499841 |
| 18               | 8                | 0              | 2.345090                | 2.275193  | 0.537805  |
| 19               | 6                | 0              | 3.192805                | 3.384792  | 0.826963  |
| 20               | 7                | 0              | -6.007788               | 0.319587  | -0.238270 |



|    |   |   |           |           |           |
|----|---|---|-----------|-----------|-----------|
| 21 | 8 | 0 | -6.765428 | -0.520089 | 0.251929  |
| 22 | 8 | 0 | -6.405934 | 1.350813  | -0.783293 |
| 23 | 1 | 0 | 4.315674  | -2.401315 | -0.750964 |
| 24 | 1 | 0 | 1.913519  | -2.025937 | -0.695740 |
| 25 | 1 | 0 | 4.981662  | 1.674528  | 0.398298  |
| 26 | 1 | 0 | -1.659623 | 1.452284  | -1.123619 |
| 27 | 1 | 0 | -4.085232 | 1.899644  | -1.214419 |
| 28 | 1 | 0 | -4.822210 | -1.758778 | 0.889966  |
| 29 | 1 | 0 | 0.286344  | 1.310813  | -0.025960 |
| 30 | 1 | 0 | -0.118396 | -1.715776 | 0.056609  |
| 31 | 1 | 0 | -1.406831 | -2.430085 | 1.618634  |
| 32 | 1 | 0 | -2.981004 | -2.987339 | 1.677570  |
| 33 | 1 | 0 | 7.832660  | -1.546740 | -0.437177 |
| 34 | 1 | 0 | 6.465609  | -2.485629 | 0.211875  |
| 35 | 1 | 0 | 6.496268  | -2.021245 | -1.513981 |
| 36 | 1 | 0 | 2.526033  | 4.215287  | 1.047293  |
| 37 | 1 | 0 | 3.819861  | 3.637383  | -0.032065 |
| 38 | 1 | 0 | 3.823507  | 3.182579  | 1.696533  |

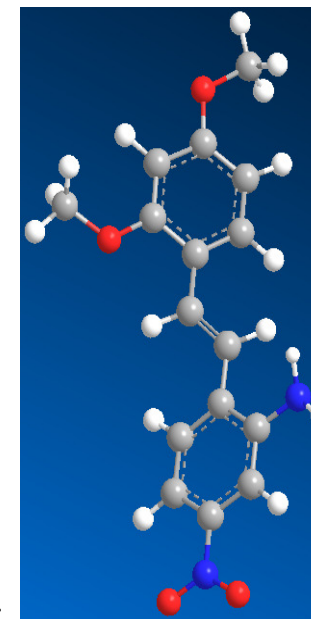

Visualization of calculated geometry of **(4b)**:

The calculated coordinates of **(5b)**( the part of calculated log file):

Standard orientation:

| Center<br>Number | Atomic<br>Number | Atomic<br>Type | Coordinates (Angstroms) |           |           |
|------------------|------------------|----------------|-------------------------|-----------|-----------|
|                  |                  |                | X                       | Y         | Z         |
| 1                | 6                | 0              | 4.135017                | -1.064943 | -0.293089 |
| 2                | 6                | 0              | 2.750722                | -0.917464 | -0.292880 |
| 3                | 6                | 0              | 2.139837                | 0.312143  | -0.042339 |
| 4                | 6                | 0              | 2.970325                | 1.434176  | 0.202900  |
| 5                | 6                | 0              | 4.351717                | 1.286629  | 0.198112  |
| 6                | 6                | 0              | 4.939015                | 0.044621  | -0.046418 |
| 7                | 6                | 0              | -2.246152               | 0.746651  | -0.720681 |
| 8                | 6                | 0              | -3.613608               | 0.919538  | -0.823352 |
| 9                | 6                | 0              | -4.434686               | -0.005015 | -0.184849 |
| 10               | 6                | 0              | -3.919921               | -1.063777 | 0.548983  |
| 11               | 6                | 0              | -2.538755               | -1.228682 | 0.659610  |
| 12               | 6                | 0              | -1.672916               | -0.310368 | 0.003064  |

|    |   |   |           |           |           |
|----|---|---|-----------|-----------|-----------|
| 13 | 6 | 0 | 0.688909  | 0.480675  | -0.041446 |
| 14 | 6 | 0 | -0.227155 | -0.500112 | 0.065657  |
| 15 | 7 | 0 | -2.027379 | -2.307017 | 1.369333  |
| 16 | 7 | 0 | -5.883290 | 0.141076  | -0.284140 |
| 17 | 8 | 0 | -6.596314 | -0.689765 | 0.279877  |
| 18 | 8 | 0 | -6.331031 | 1.091015  | -0.927357 |
| 19 | 8 | 0 | 2.332386  | 2.616948  | 0.448380  |
| 20 | 6 | 0 | 3.121432  | 3.784641  | 0.651075  |
| 21 | 8 | 0 | 4.603141  | -2.324465 | -0.556204 |
| 22 | 6 | 0 | 6.012512  | -2.525529 | -0.566787 |
| 23 | 1 | 0 | 2.148631  | -1.789336 | -0.516846 |
| 24 | 1 | 0 | 4.997581  | 2.132321  | 0.387634  |
| 25 | 1 | 0 | 6.017494  | -0.029429 | -0.045320 |
| 26 | 1 | 0 | -1.593672 | 1.431418  | -1.247400 |
| 27 | 1 | 0 | -4.040798 | 1.729233  | -1.395364 |
| 28 | 1 | 0 | -4.594317 | -1.749157 | 1.043954  |
| 29 | 1 | 0 | 0.348606  | 1.507444  | -0.103794 |
| 30 | 1 | 0 | 0.109503  | -1.521272 | 0.216504  |
| 31 | 1 | 0 | -1.152282 | -2.155745 | 1.852133  |
| 32 | 1 | 0 | -2.694839 | -2.792656 | 1.955164  |
| 33 | 1 | 0 | 2.414534  | 4.598421  | 0.797522  |
| 34 | 1 | 0 | 3.746650  | 3.997717  | -0.220627 |
| 35 | 1 | 0 | 3.752406  | 3.687904  | 1.539134  |
| 36 | 1 | 0 | 6.161832  | -3.580632 | -0.785807 |
| 37 | 1 | 0 | 6.494985  | -1.922705 | -1.341895 |
| 38 | 1 | 0 | 6.455144  | -2.290908 | 0.405731  |

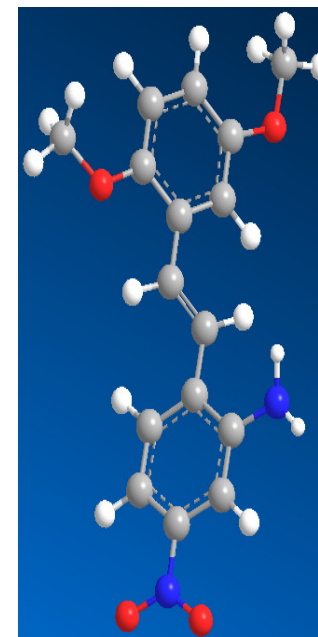

Visualization of calculated geometry of **(5b)**:

The calculated coordinates of **(6b)**( the part of calculated log file):

Standard orientation:

| Center<br>Number | Atomic<br>Number | Atomic<br>Type | Coordinates (Angstroms) |           |           |
|------------------|------------------|----------------|-------------------------|-----------|-----------|
|                  |                  |                | X                       | Y         | Z         |
| 1                | 6                | 0              | 3.814351                | 1.089866  | -0.076089 |
| 2                | 6                | 0              | 2.431327                | 0.956560  | -0.098753 |
| 3                | 6                | 0              | 1.847389                | -0.314857 | -0.036457 |
| 4                | 6                | 0              | 2.674550                | -1.440699 | 0.041922  |

|    |   |   |           |           |           |
|----|---|---|-----------|-----------|-----------|
| 5  | 6 | 0 | 4.060422  | -1.299345 | 0.064152  |
| 6  | 6 | 0 | 4.646149  | -0.033828 | 0.006101  |
| 7  | 6 | 0 | -2.540278 | -1.113672 | -0.217654 |
| 8  | 6 | 0 | -3.896446 | -1.365797 | -0.195432 |
| 9  | 6 | 0 | -4.754860 | -0.284170 | -0.016025 |
| 10 | 6 | 0 | -4.281475 | 1.009628  | 0.123204  |
| 11 | 6 | 0 | -2.907325 | 1.263429  | 0.099232  |
| 12 | 6 | 0 | -2.001132 | 0.175400  | -0.059042 |
| 13 | 6 | 0 | 0.400493  | -0.534050 | -0.049942 |
| 14 | 6 | 0 | -0.560384 | 0.408753  | -0.048899 |
| 15 | 7 | 0 | -2.468495 | 2.564937  | 0.303433  |
| 16 | 7 | 0 | -6.195428 | -0.513099 | 0.012412  |
| 17 | 8 | 0 | -6.939808 | 0.454537  | 0.174505  |
| 18 | 8 | 0 | -6.604505 | -1.666267 | -0.126611 |
| 19 | 8 | 0 | 4.286930  | 2.367592  | -0.141883 |
| 20 | 6 | 0 | 5.695447  | 2.583044  | -0.112090 |
| 21 | 8 | 0 | 4.772331  | -2.458927 | 0.143589  |
| 22 | 6 | 0 | 6.195356  | -2.388196 | 0.181627  |
| 23 | 1 | 0 | 1.835672  | 1.856877  | -0.170253 |
| 24 | 1 | 0 | 2.250680  | -2.436369 | 0.089954  |
| 25 | 1 | 0 | 5.718063  | 0.077532  | 0.020901  |
| 26 | 1 | 0 | -1.870020 | -1.949770 | -0.366790 |
| 27 | 1 | 0 | -4.288687 | -2.364333 | -0.315175 |
| 28 | 1 | 0 | -4.982380 | 1.823509  | 0.249819  |
| 29 | 1 | 0 | 0.113982  | -1.581007 | -0.046952 |
| 30 | 1 | 0 | -0.239374 | 1.442537  | -0.014328 |
| 31 | 1 | 0 | -1.603001 | 2.839116  | -0.139133 |
| 32 | 1 | 0 | -3.178884 | 3.276728  | 0.188043  |
| 33 | 1 | 0 | 5.830644  | 3.660906  | -0.167395 |
| 34 | 1 | 0 | 6.134535  | 2.210718  | 0.817659  |
| 35 | 1 | 0 | 6.188000  | 2.112660  | -0.967605 |
| 36 | 1 | 0 | 6.541107  | -3.417194 | 0.249850  |
| 37 | 1 | 0 | 6.541119  | -1.830956 | 1.056752  |
| 38 | 1 | 0 | 6.594904  | -1.931689 | -0.728193 |

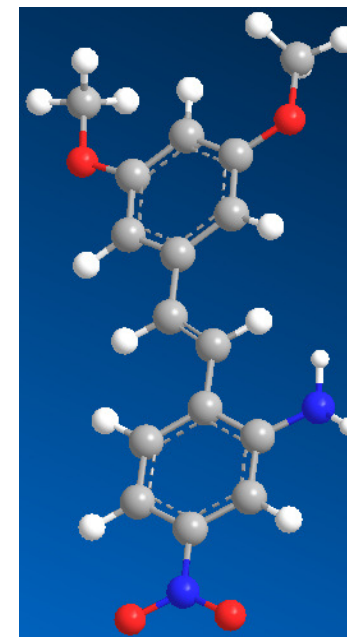

Visualization of calculated geometry of (**6b**):

The calculated coordinates of **(7b)**( the part of calculated log file):

Standard orientation:

| Center<br>Number | Atomic<br>Number | Atomic<br>Type | Coordinates (Angstroms) |           |           |
|------------------|------------------|----------------|-------------------------|-----------|-----------|
|                  |                  |                | X                       | Y         | Z         |
| 1                | 6                | 0              | -3.312225               | 1.081979  | 0.094523  |
| 2                | 6                | 0              | -1.932889               | 0.958396  | 0.116671  |
| 3                | 6                | 0              | -1.321270               | -0.295073 | -0.035339 |
| 4                | 6                | 0              | -2.144128               | -1.418614 | -0.189983 |
| 5                | 6                | 0              | -3.527822               | -1.303511 | -0.214151 |
| 6                | 6                | 0              | -4.130174               | -0.046735 | -0.084236 |
| 7                | 6                | 0              | 3.045161                | -1.060320 | 0.338571  |
| 8                | 6                | 0              | 4.398789                | -1.328643 | 0.337905  |
| 9                | 6                | 0              | 5.266333                | -0.282952 | 0.036140  |
| 10               | 6                | 0              | 4.806248                | 0.992017  | -0.248854 |
| 11               | 6                | 0              | 3.434920                | 1.260631  | -0.250918 |
| 12               | 6                | 0              | 2.519822                | 0.208704  | 0.038817  |
| 13               | 6                | 0              | 0.125567                | -0.495457 | -0.039167 |
| 14               | 6                | 0              | 1.080445                | 0.450841  | 0.025004  |
| 15               | 7                | 0              | 3.008110                | 2.528154  | -0.618283 |
| 16               | 8                | 0              | -4.286306               | -2.425788 | -0.443378 |
| 17               | 6                | 0              | -5.035161               | -2.899493 | 0.687933  |
| 18               | 8                | 0              | -5.494407               | 0.079047  | -0.102516 |
| 19               | 6                | 0              | -6.047706               | 0.336109  | -1.405550 |
| 20               | 8                | 0              | -3.876232               | 2.332743  | 0.176185  |
| 21               | 6                | 0              | -4.494614               | 2.636825  | 1.436985  |
| 22               | 7                | 0              | 6.704567                | -0.528882 | 0.032479  |
| 23               | 8                | 0              | 7.458431                | 0.405631  | -0.240875 |
| 24               | 8                | 0              | 7.101919                | -1.662985 | 0.300779  |
| 25               | 1                | 0              | -1.351696               | 1.861629  | 0.251473  |
| 26               | 1                | 0              | -1.710169               | -2.405018 | -0.305561 |
| 27               | 1                | 0              | 2.365328                | -1.860521 | 0.598228  |
| 28               | 1                | 0              | 4.781822                | -2.309722 | 0.573032  |
| 29               | 1                | 0              | 5.514363                | 1.777279  | -0.474054 |
| 30               | 1                | 0              | 0.425997                | -1.535264 | -0.121446 |
| 31               | 1                | 0              | 0.759194                | 1.485646  | 0.057495  |
| 32               | 1                | 0              | 2.125780                | 2.852061  | -0.249209 |
| 33               | 1                | 0              | 3.715735                | 3.250525  | -0.569927 |
| 34               | 1                | 0              | -5.586064               | -3.772450 | 0.342644  |
| 35               | 1                | 0              | -5.732054               | -2.138314 | 1.041220  |

|    |   |   |           |           |           |
|----|---|---|-----------|-----------|-----------|
| 36 | 1 | 0 | -4.357471 | -3.191079 | 1.495446  |
| 37 | 1 | 0 | -7.124484 | 0.416822  | -1.268473 |
| 38 | 1 | 0 | -5.292091 | 1.927039  | 1.662845  |
| 39 | 1 | 0 | -5.823417 | -0.488930 | -2.085496 |
| 40 | 1 | 0 | -4.910146 | 3.637998  | 1.337948  |
| 41 | 1 | 0 | -5.655944 | 1.272229  | -1.809613 |
| 42 | 1 | 0 | -3.748421 | 2.627746  | 2.236395  |

---

Visualization of calculated geometry of (**7b**):

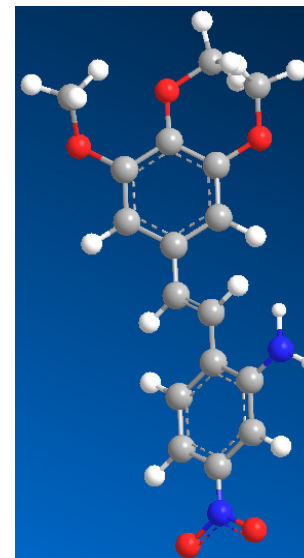

#### References in supplementary materials:

- [1] H. Krawczyk, K. Janowska, R. Matczak, J. Zakrzewski. *Tet. Lett.* **2012**, 53, 6504-6507.
- [2] M.J. Frisch, G.W. Trucks, H.B. Schlegel, G.E. Scuseria, M.A. Robb, J.R. Cheeseman, J.A. Montgomery, T. Vreven, K.N. Kudin, J.C. Burant, J.M. Millam, S.S. Iyengar, J. Tomasi, V. Barone, B. Mennucci, M. Cossi, G. Scalmani, N. Rega, G.A. Petersson, H. Nakatsuji, M. Hada, M. Ehara, K. Toyota, R. Fukuda, J. Hasegawa, M. Ishida, T. Nakajima, Y. Honda, O. Kitao, H. Nakai, M. Klene, X. Li, J.E. Knox, H.P. Hratchian, J.B. Cross, V. Bakken, C. Adamo, J. Jaramillo, R. Gomperts, R.E. Stratmann, O. Yazyev, A.J. Austin, R. Cammi, C. Pomelli, J.W. Ochterski, P.Y. Ayala, K. Morokuma, G.A. Voth, P. Salvador, J.J. Dannenberg, V.G. Zakrzewski, S. Dapprich, A.D. Daniels, M.C. Strain, O. Farkas, D.K. Malick, A.D. Rabuck, K. Raghavachari, J.B. Foresman, J.V. Ortiz, Q. Cui, A.G. Baboul, S. Clifford, J. Cioslowski, B.B. Stefanov, G. Liu, A. Liashenko, P. Piskorz, I. Komaromi, R.L. Martin, D.J. Fox, T. Keith, M.A. Al-Laham, C.Y. Peng, A. Nanayakkara, M. Challacombe, P.M.W. Gill, B. Johnson, W. Chen, M.W. Wong, C. Gonzalez, J.A. Pople, Gaussian Inc., Wallingford, CT, **2004** (Gaussian 03, Revision E.01).
- [3] J. Tomasi, B. Mennucci, R. Cammi, *Chem. Rev.* **2005**, 105, 2999–3093.

Proton spectrum of **(1b)**

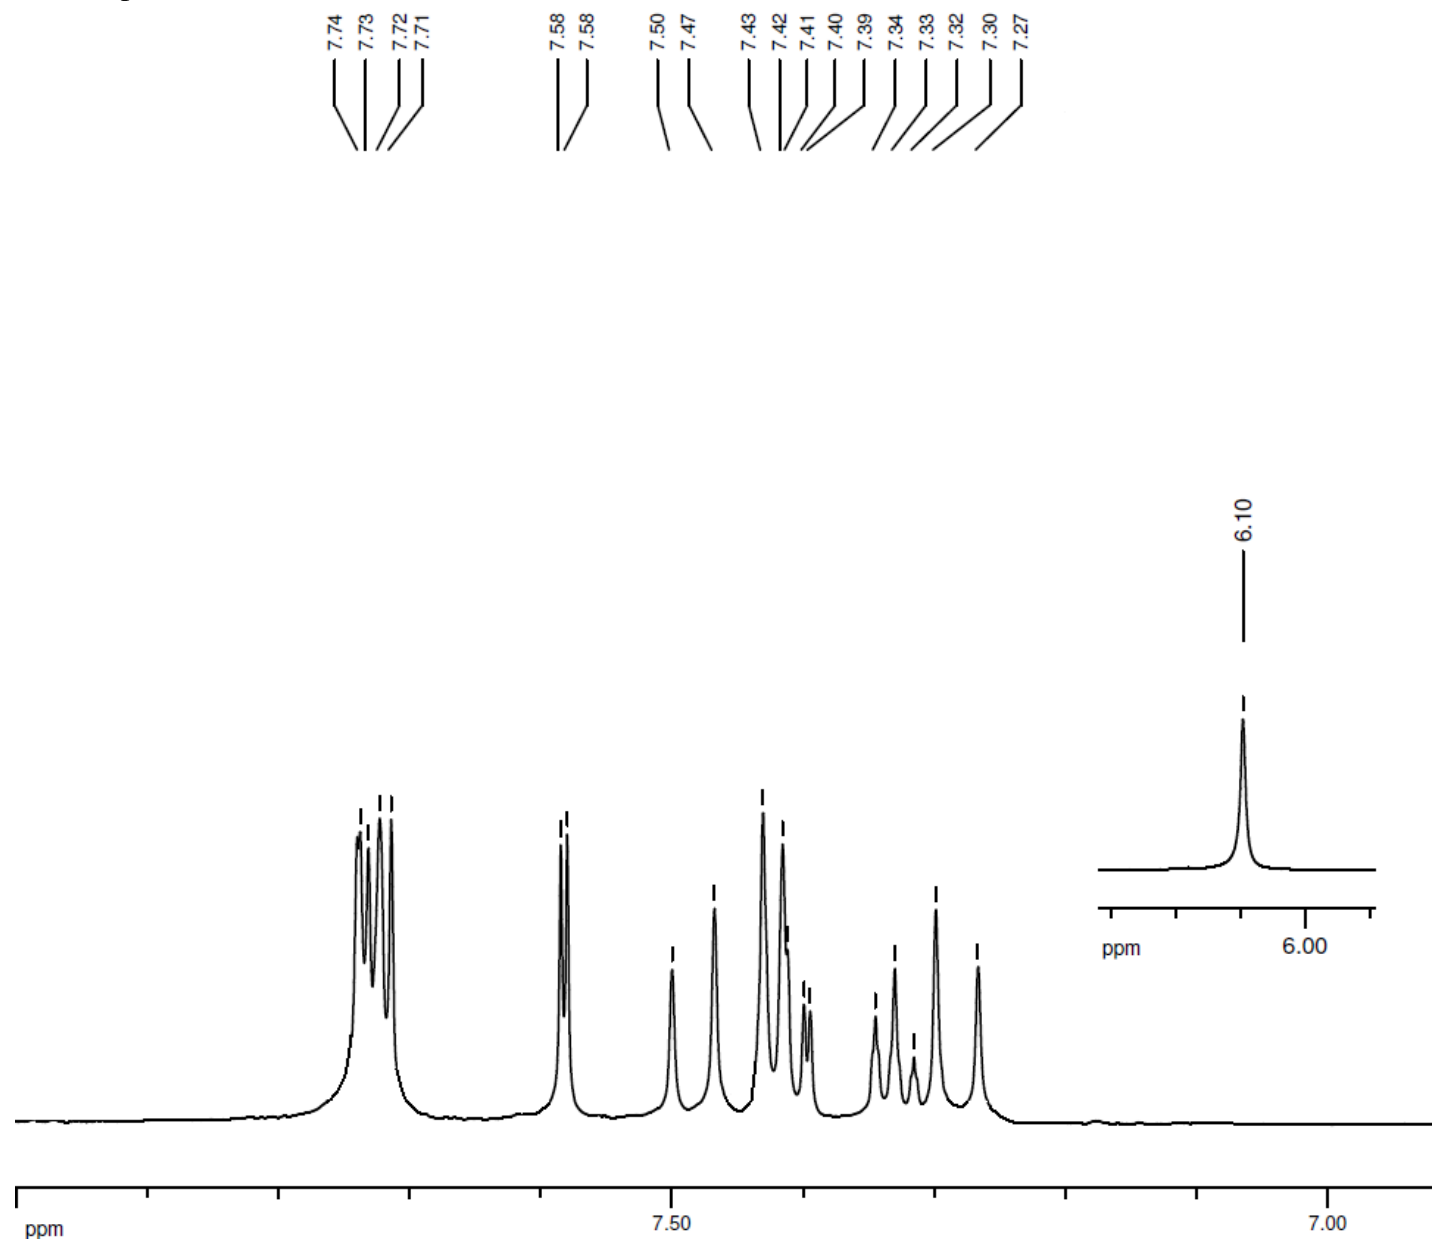

$^{13}\text{C}$  spectrum of (**1b**)

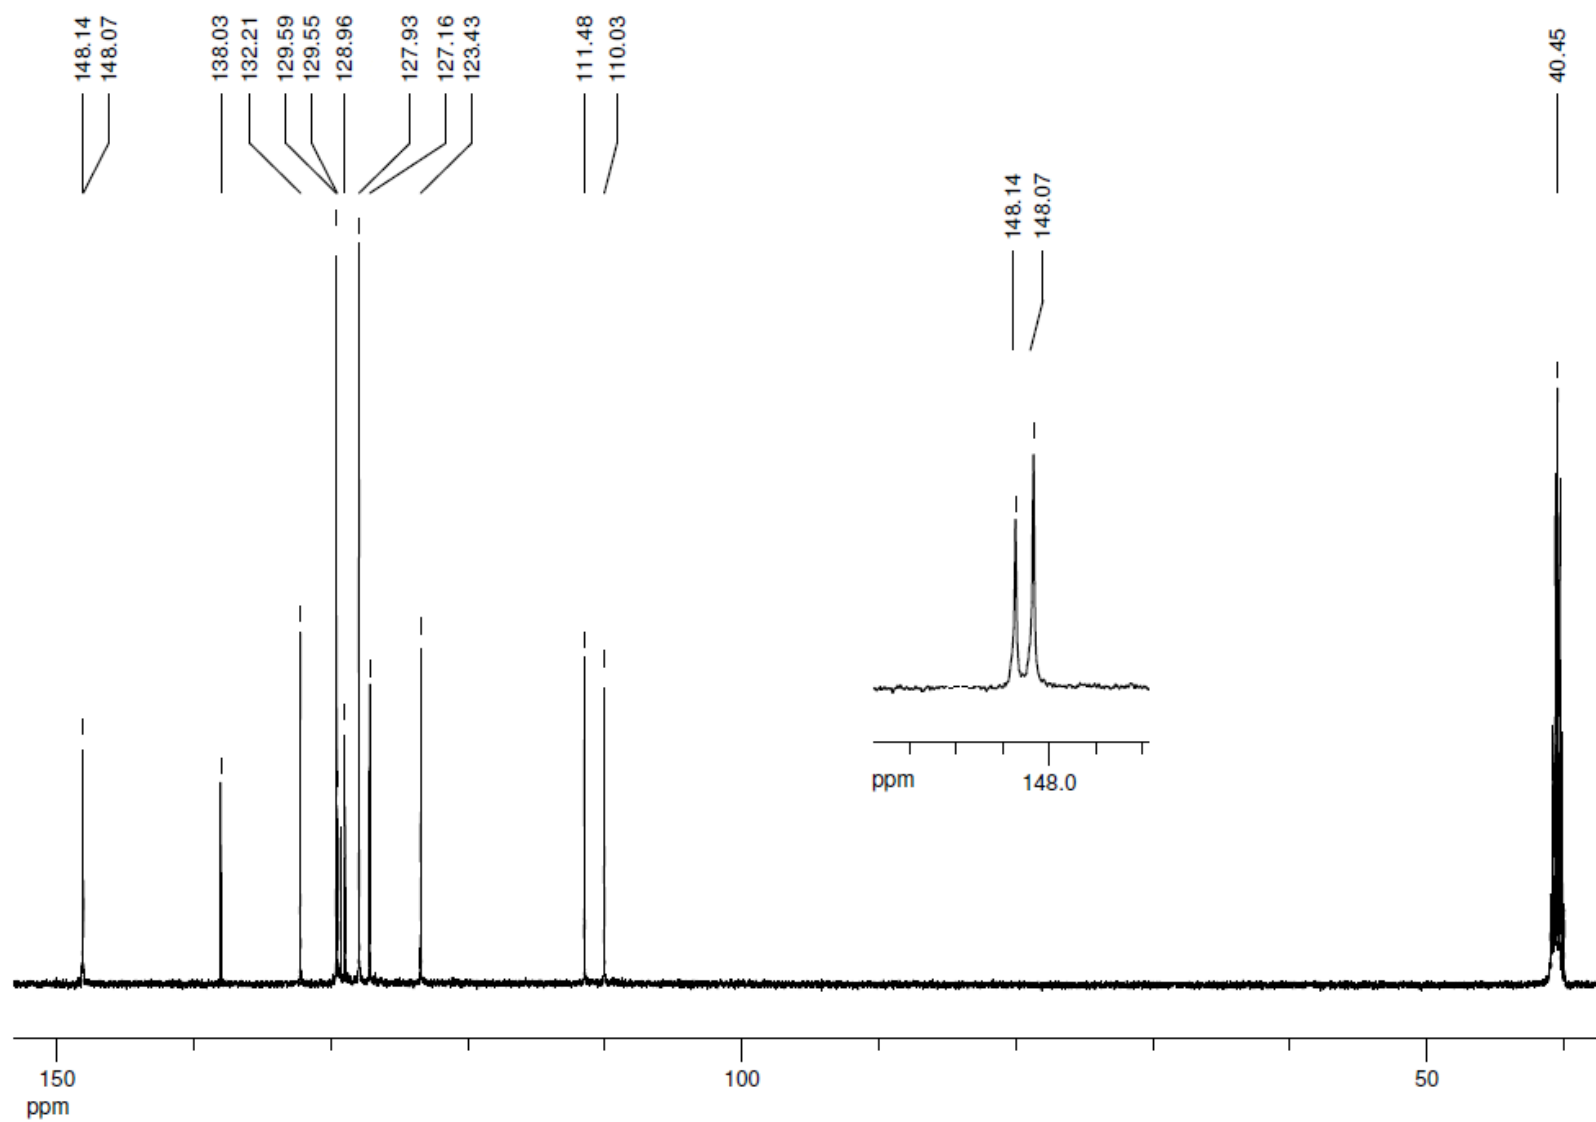

Proton spectrum of **(2b)**

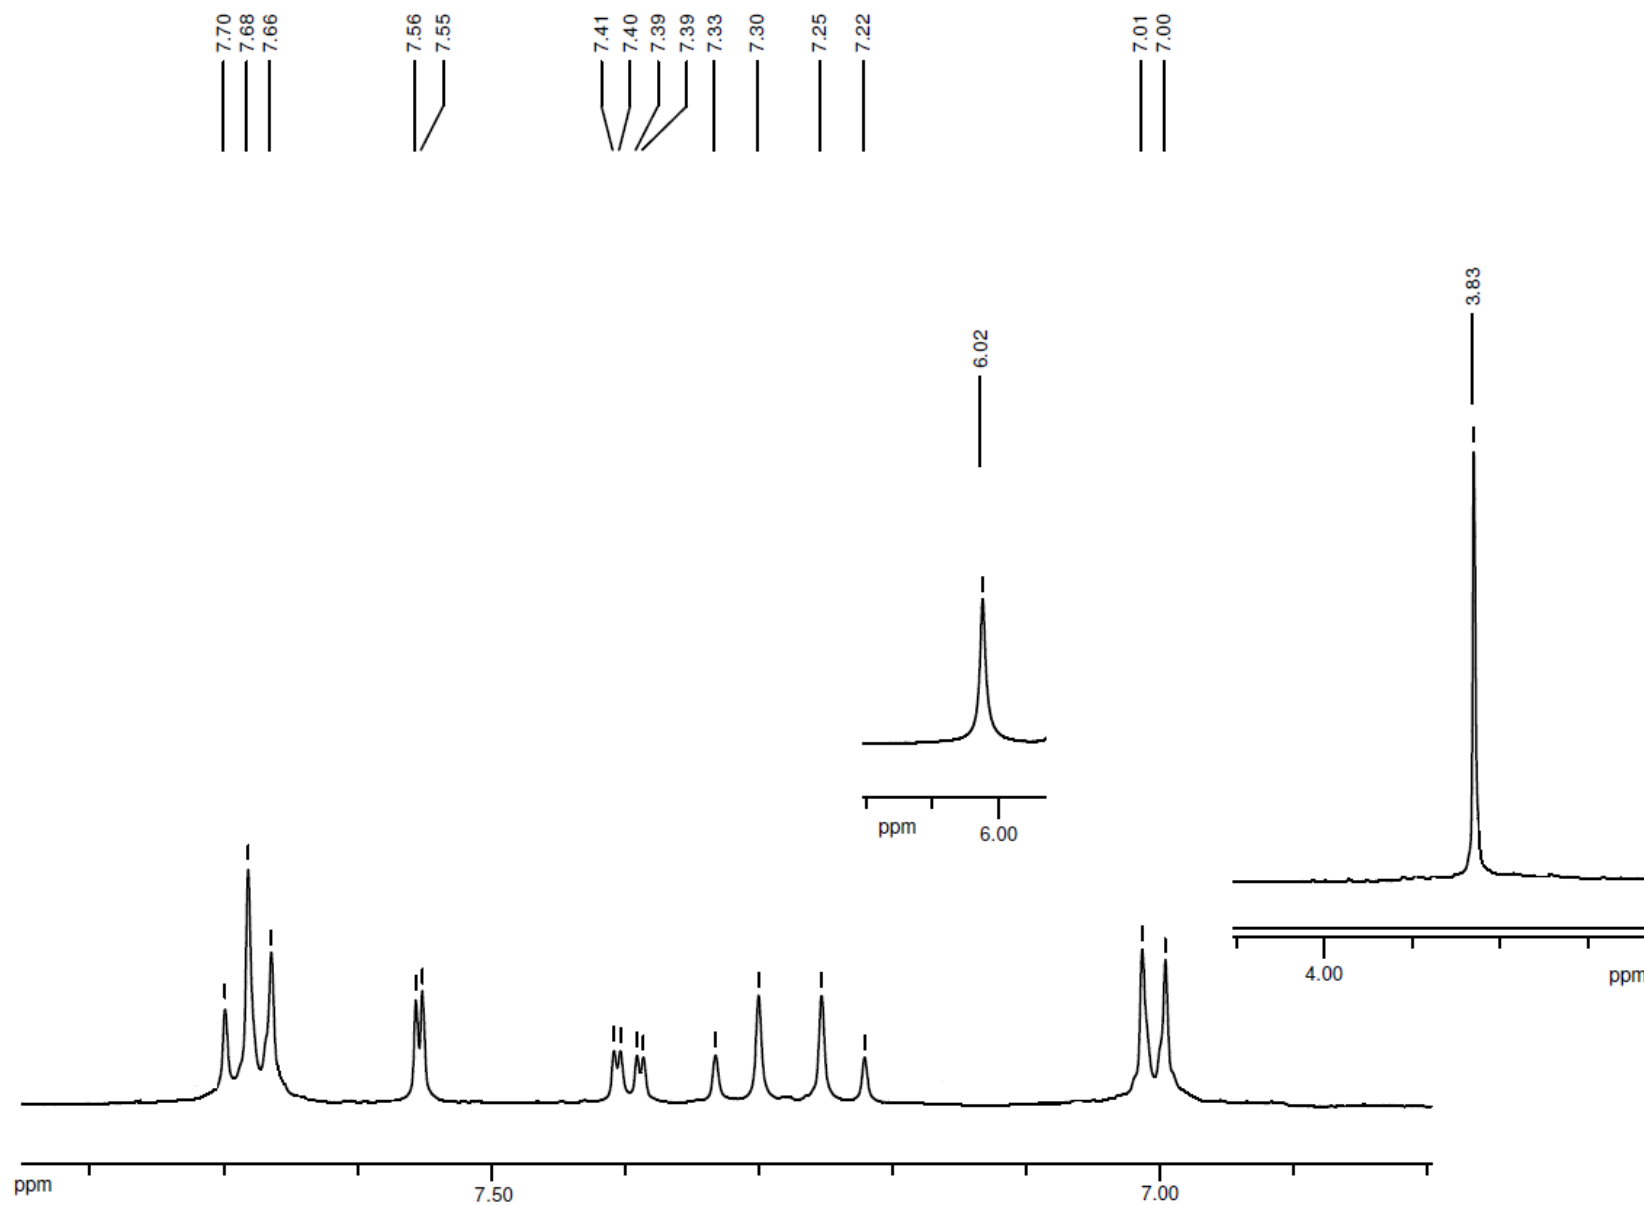



$^{13}\text{C}$  spectrum of (**2b**)

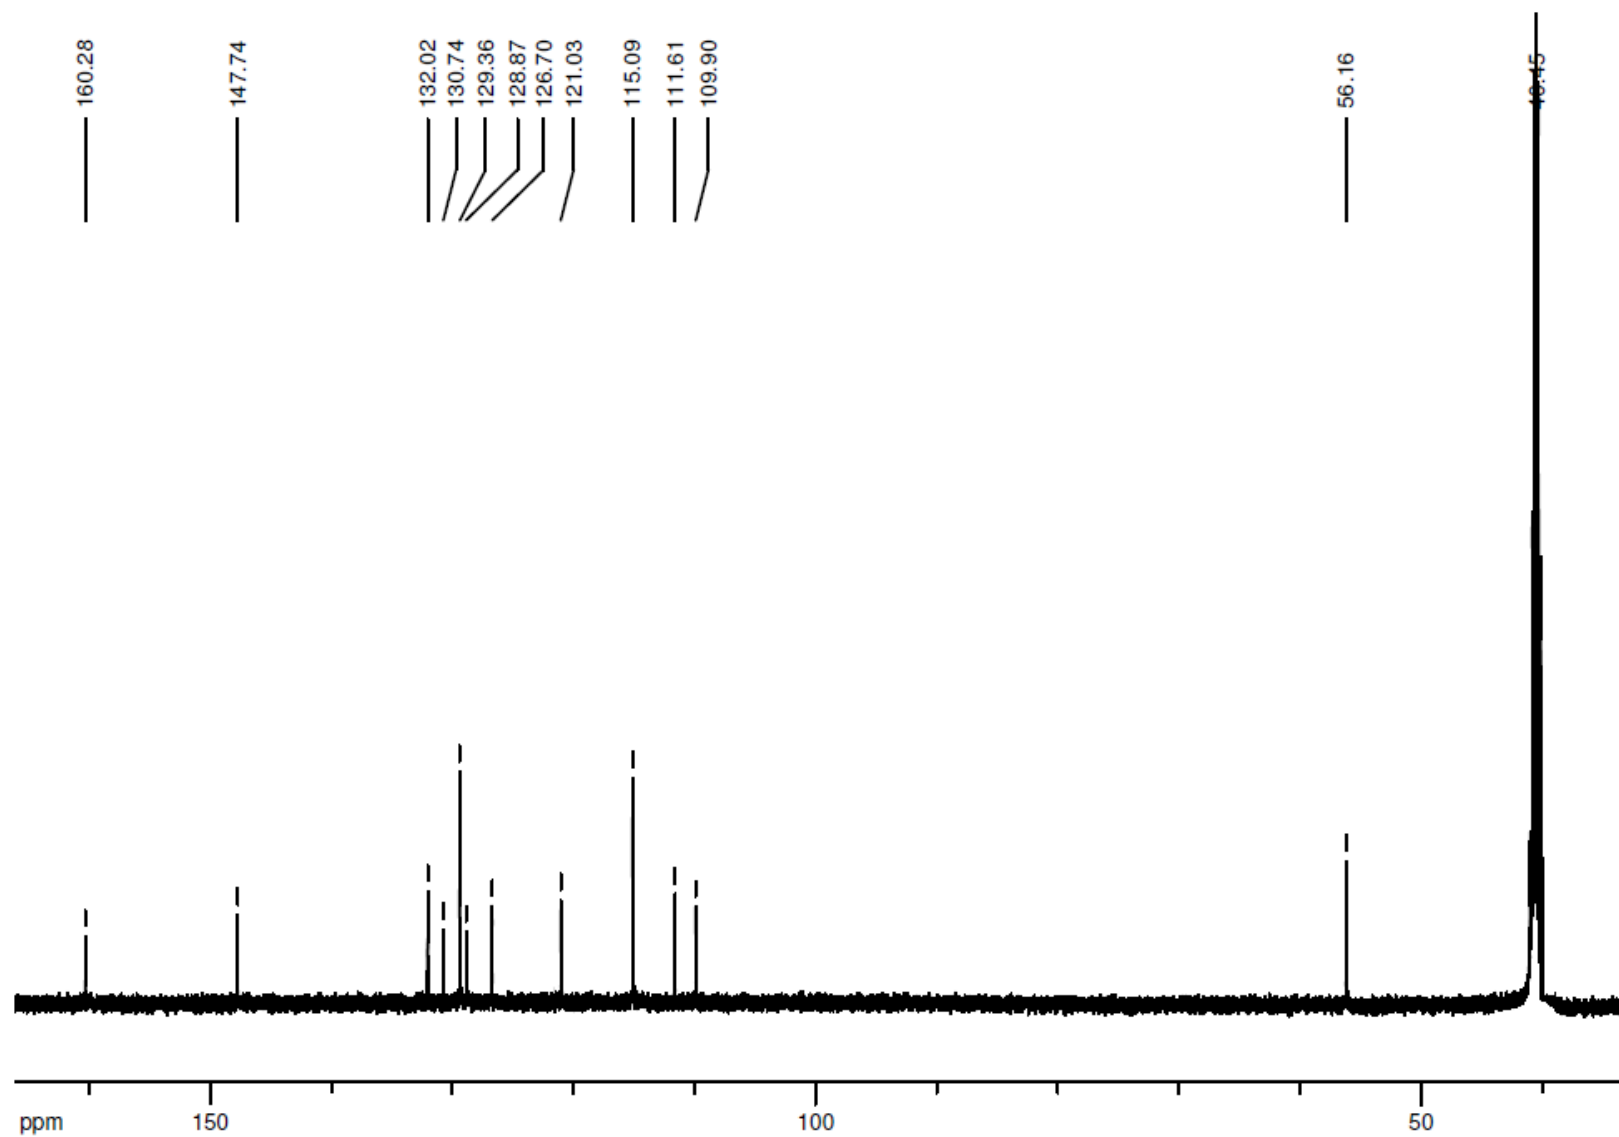

Proton spectrum of (**3b**)

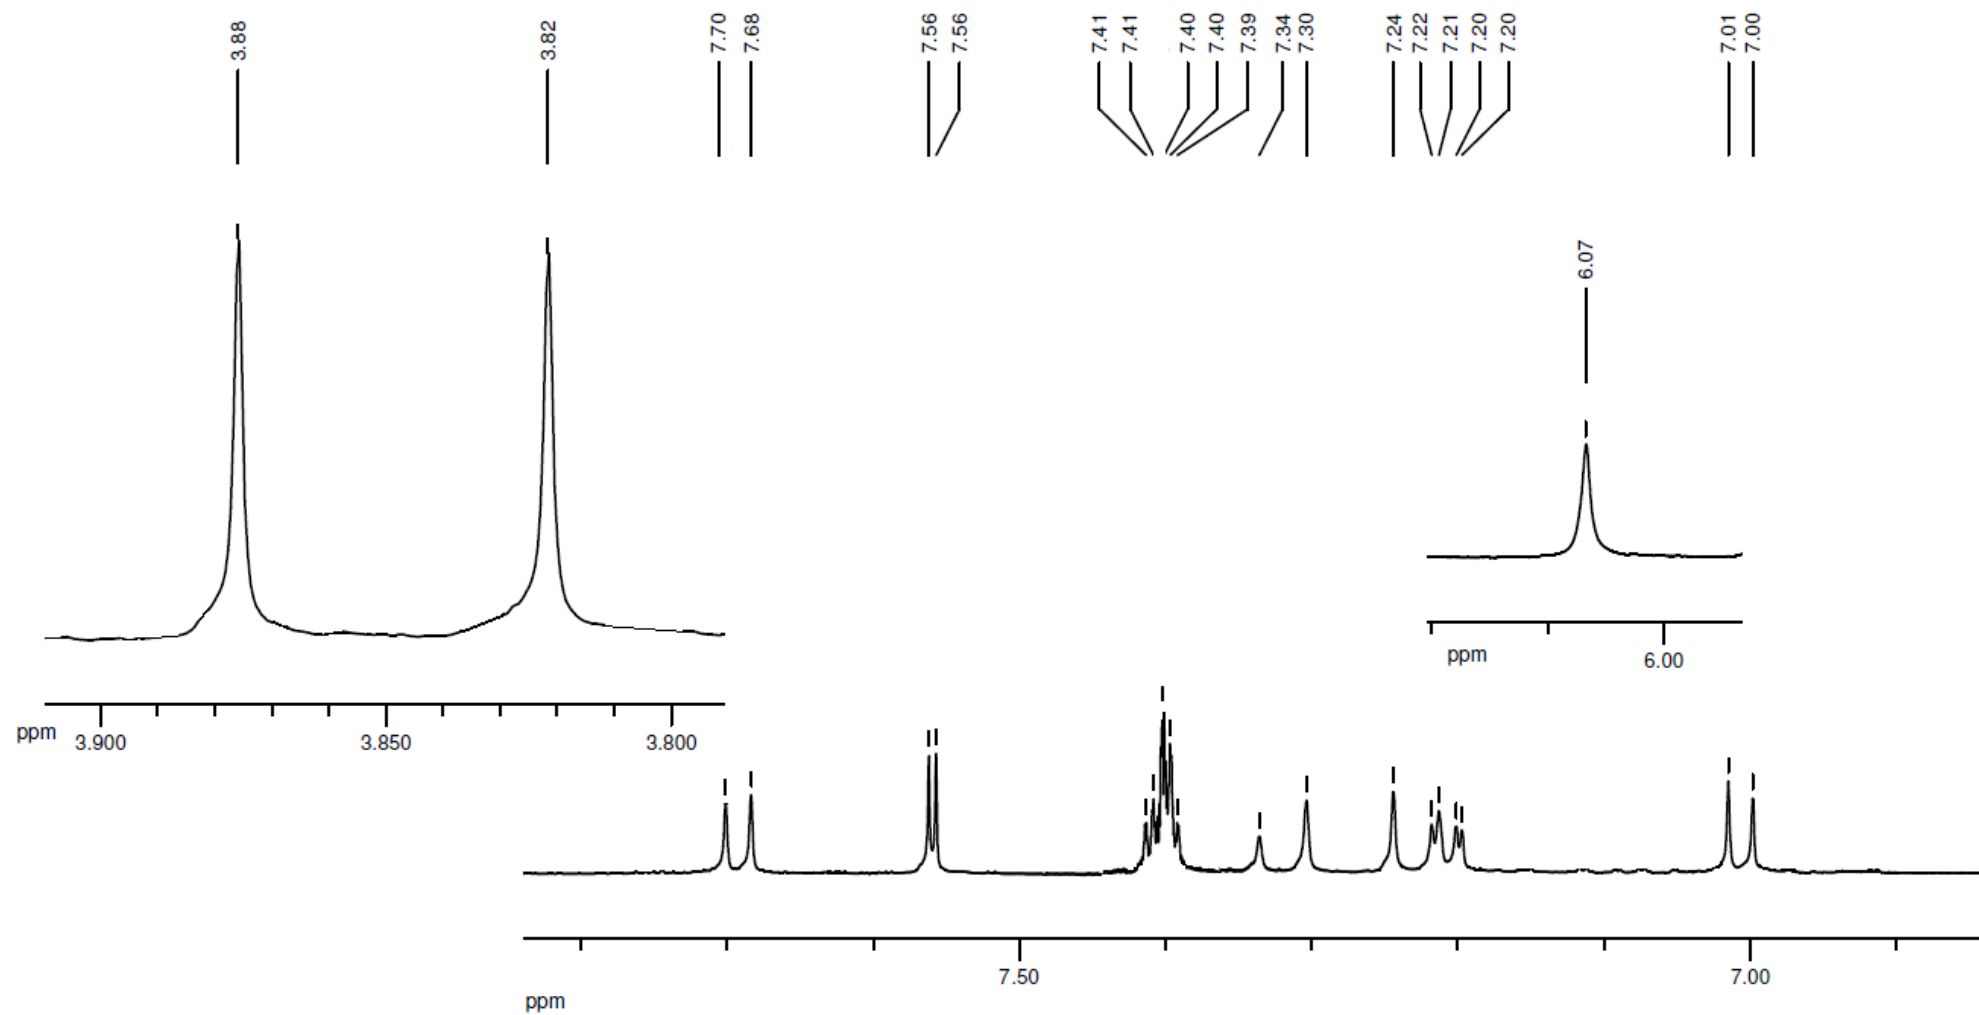

$^{13}\text{C}$  spectrum of (**3b**)

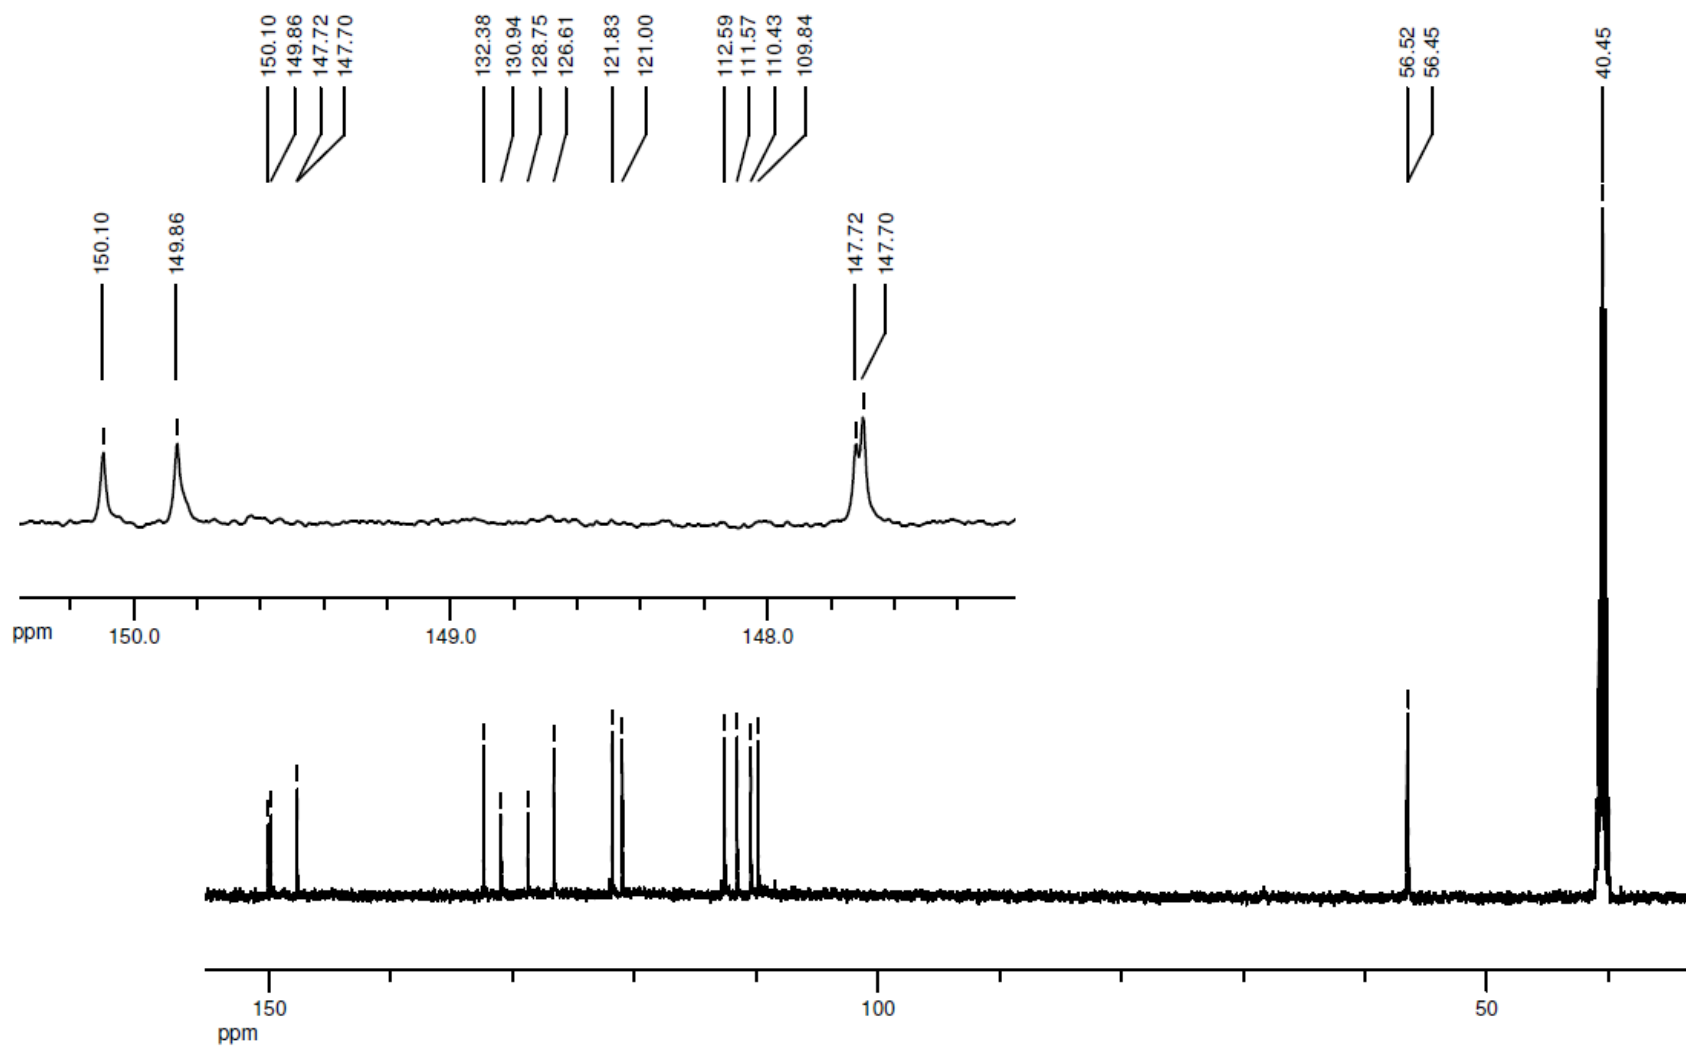

Proton spectrum of **(4b)**

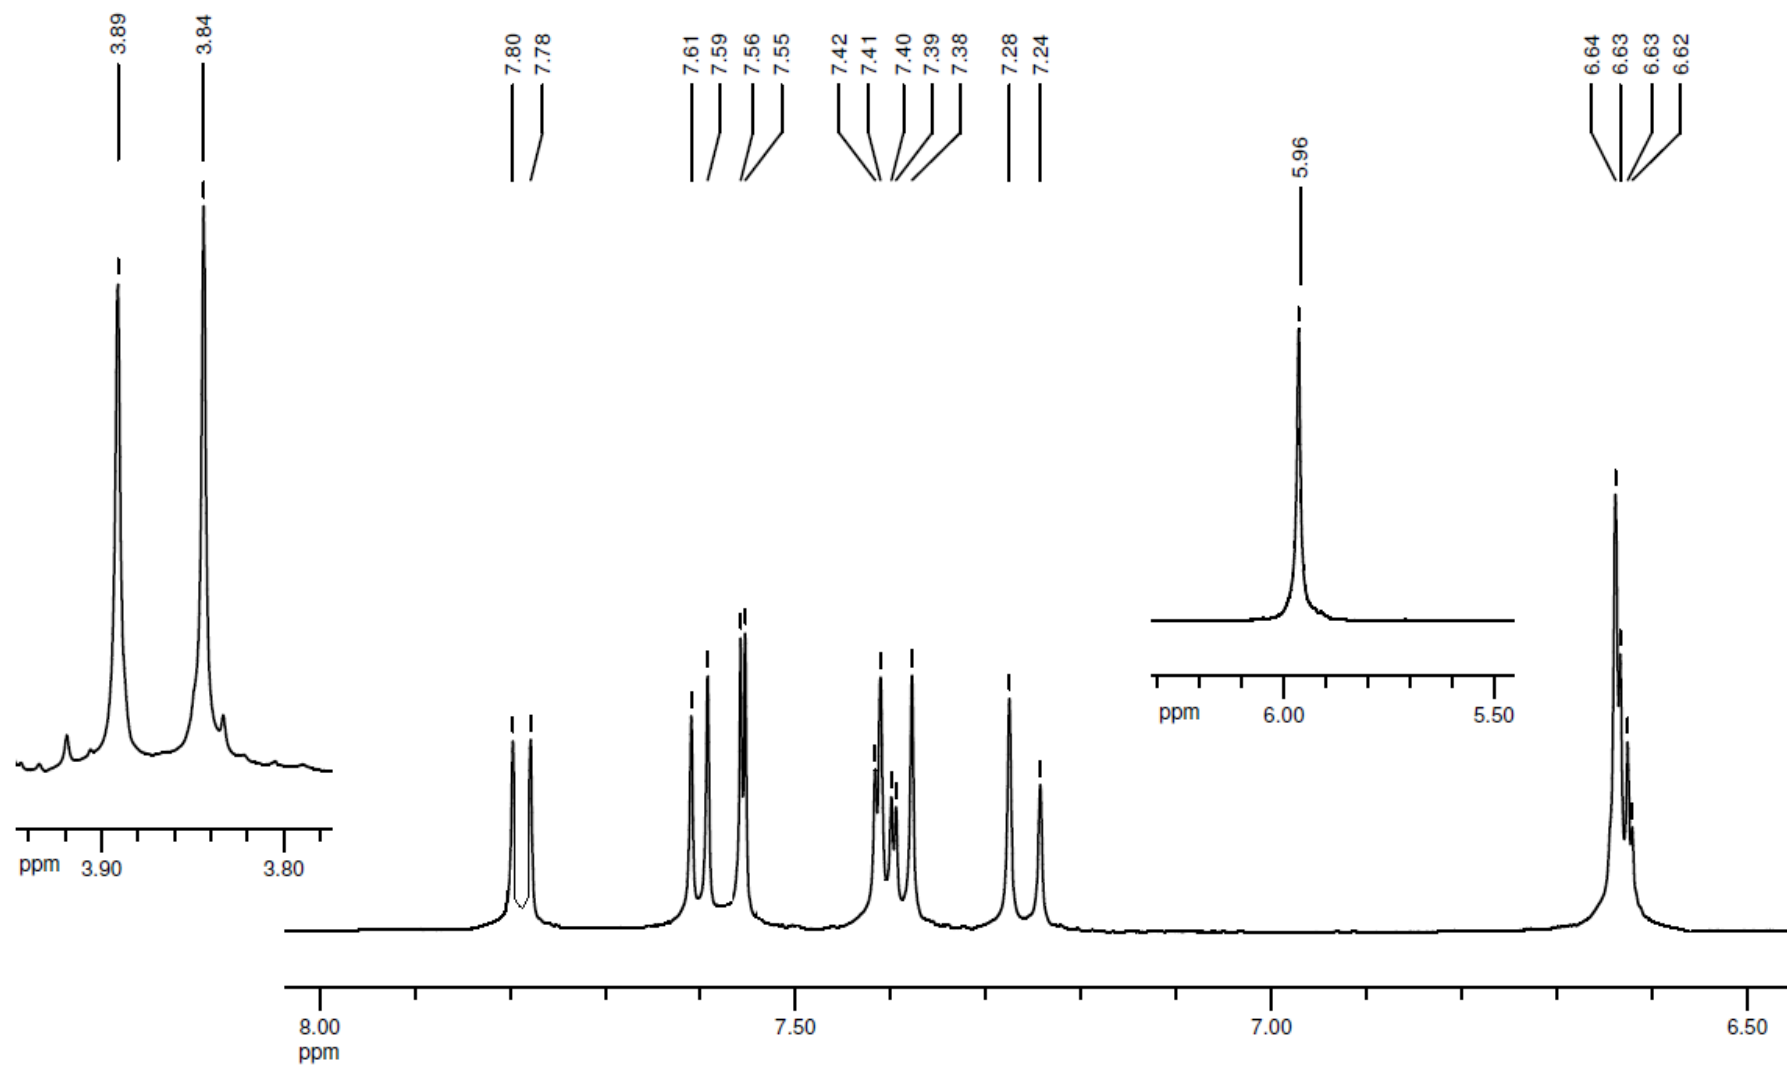

$^{13}\text{C}$  spectrum of **(4b)**

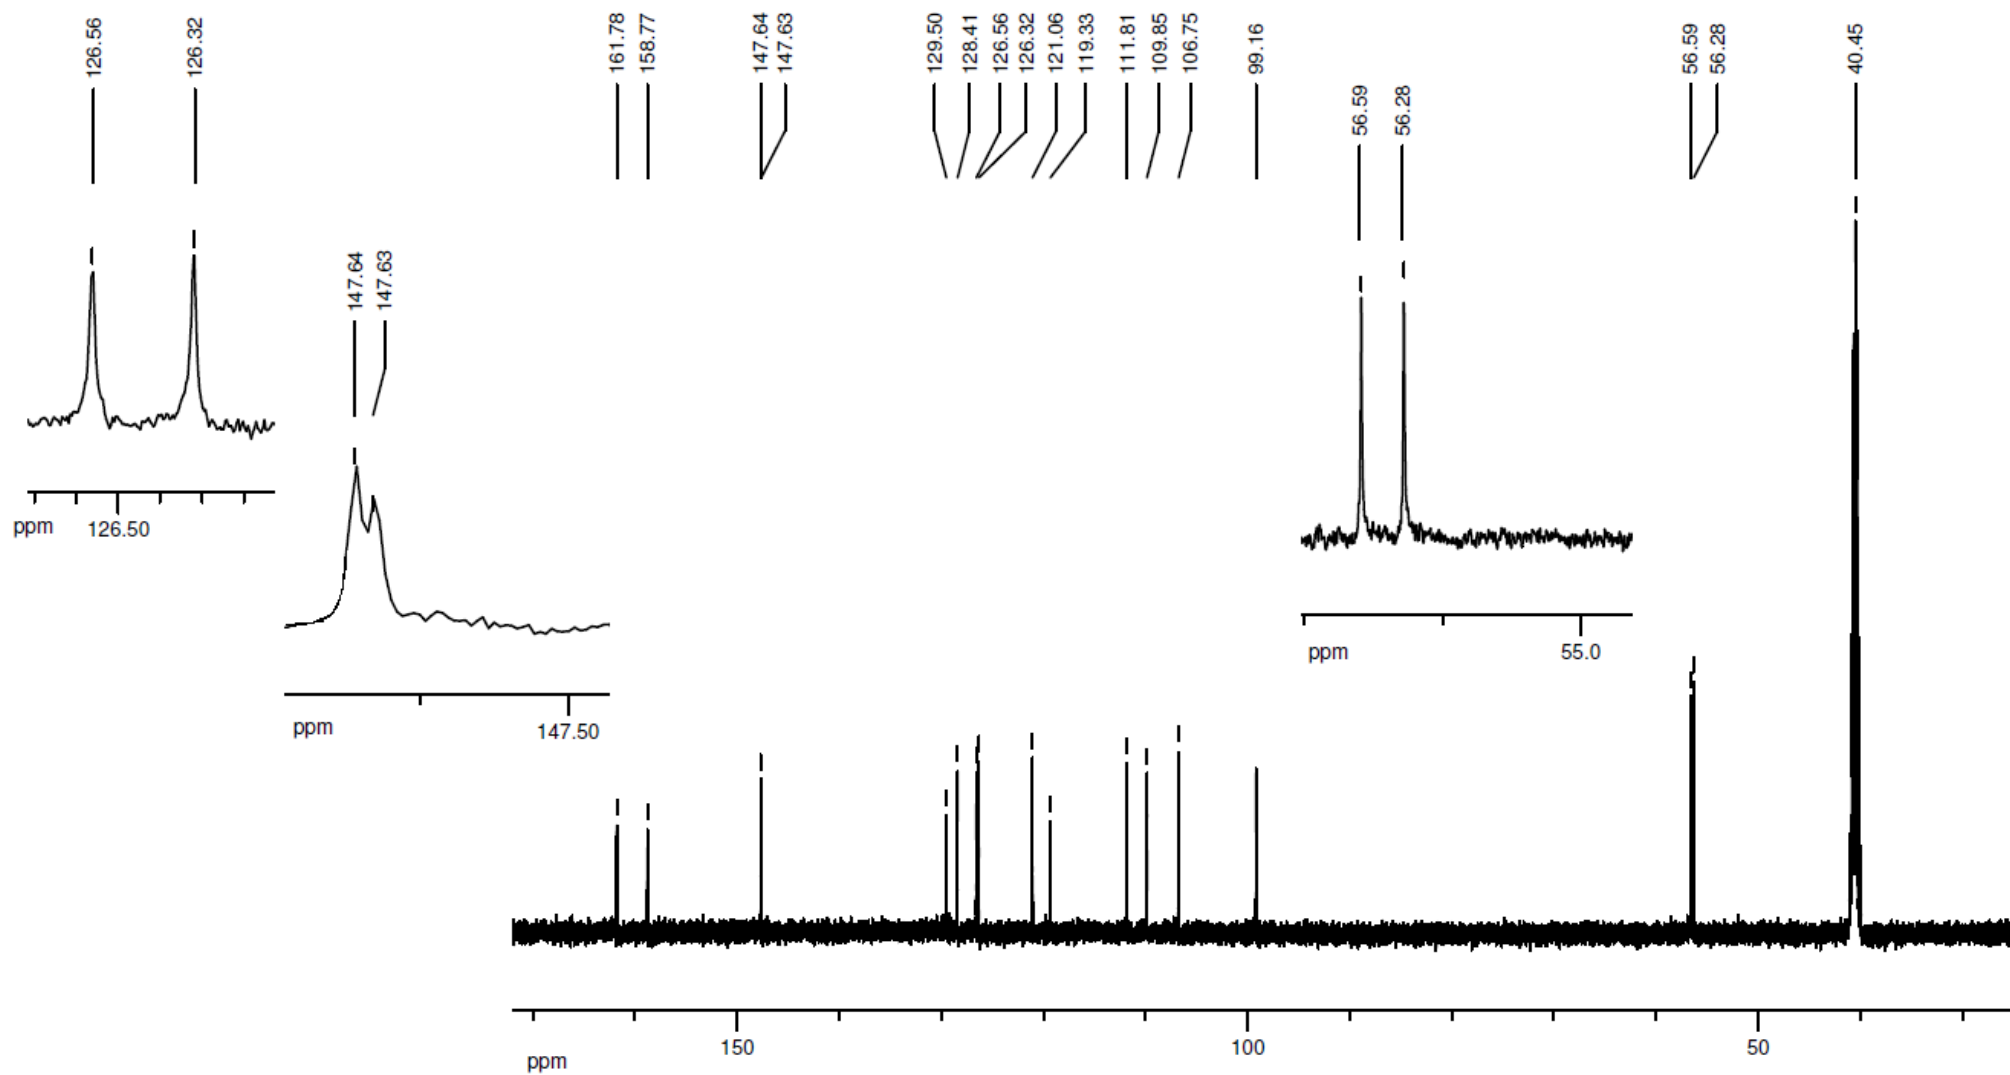

Proton spectrum of (**5b**)

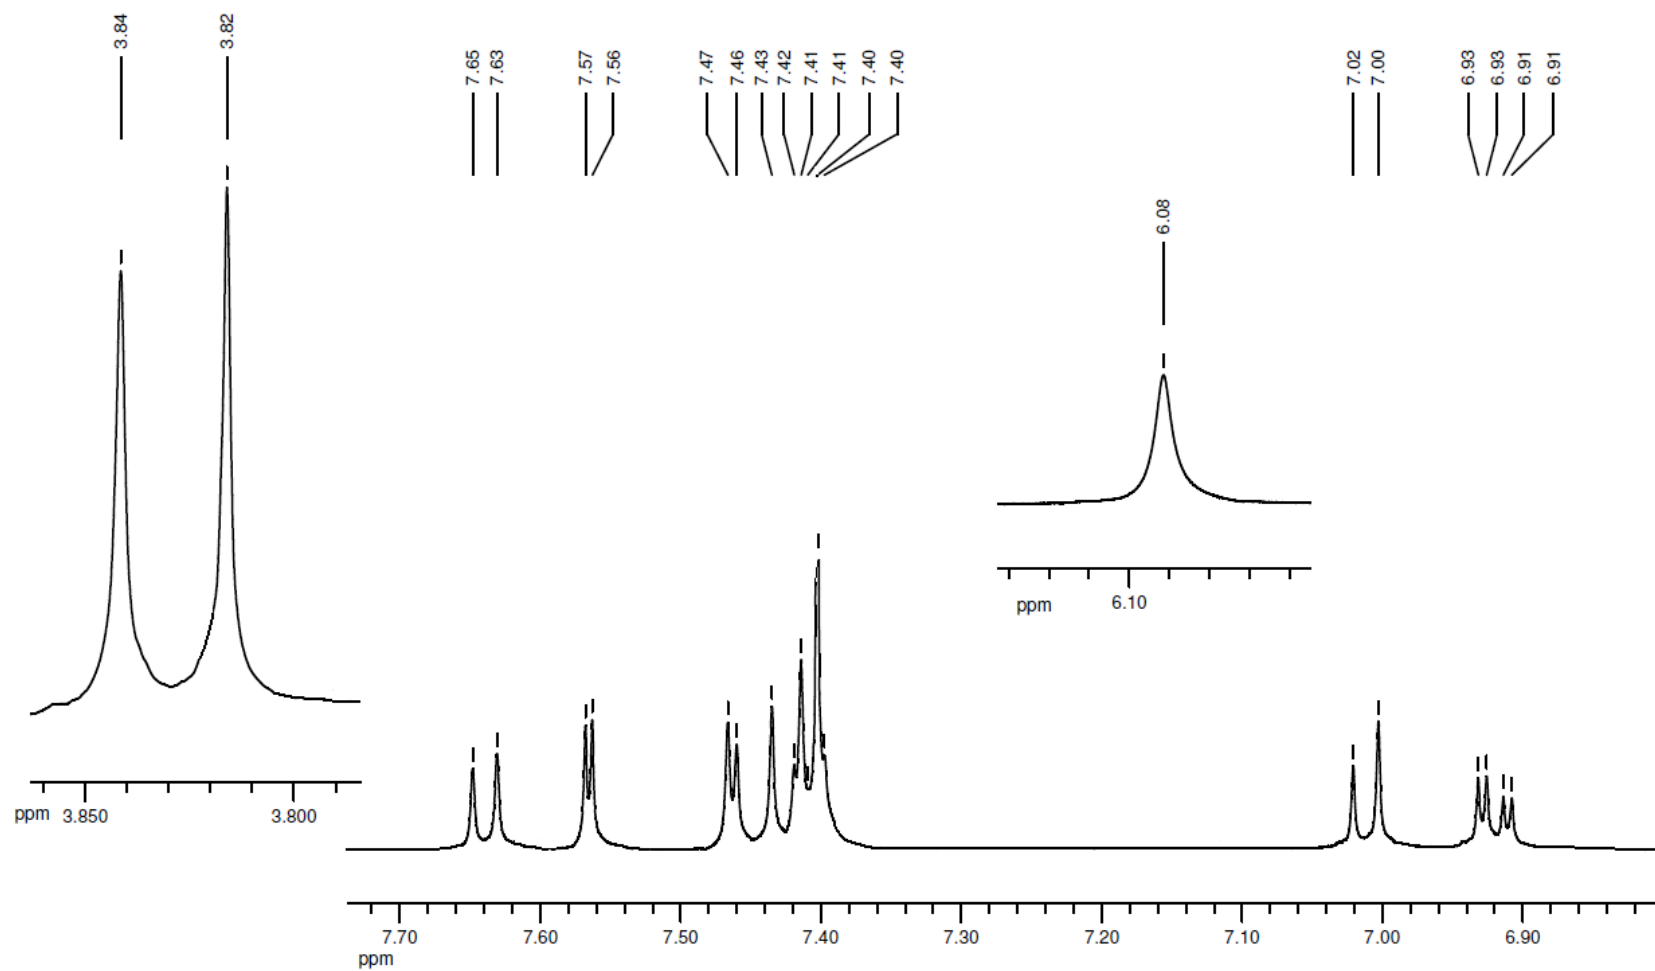

$^{13}\text{C}$  spectrum of (**5b**)

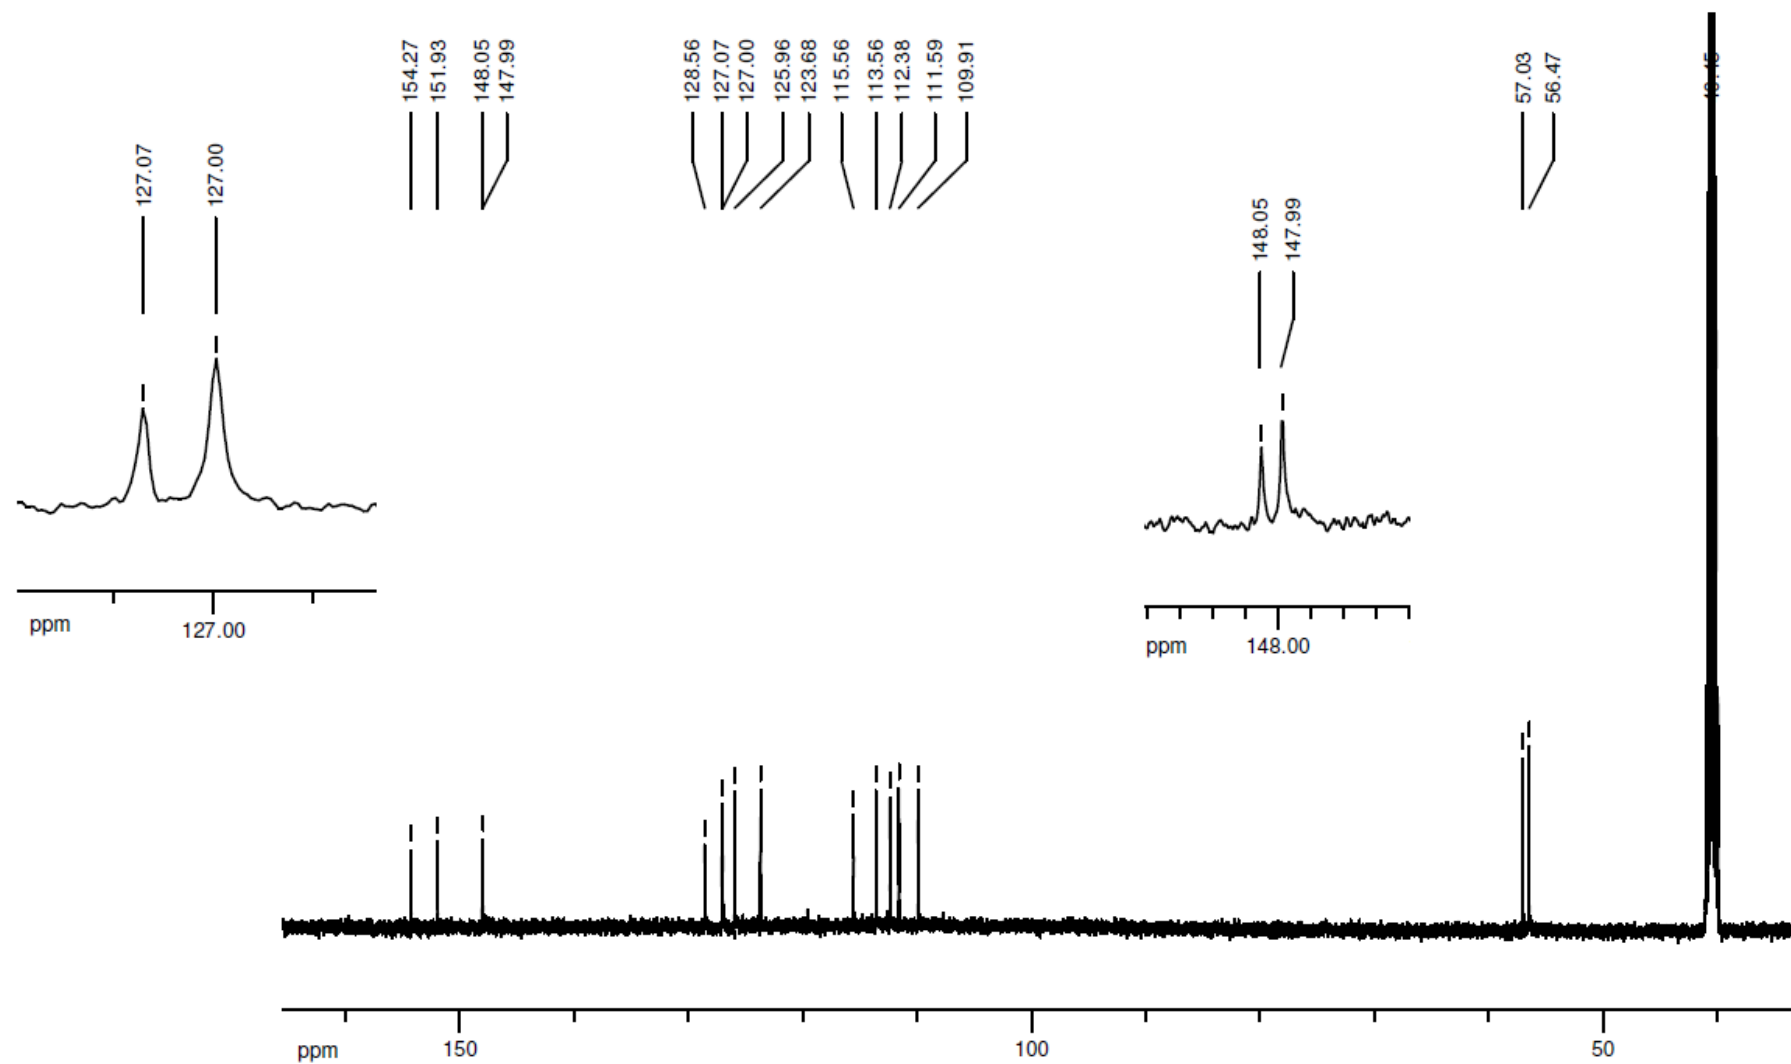

Proton spectrum of **(6b)**

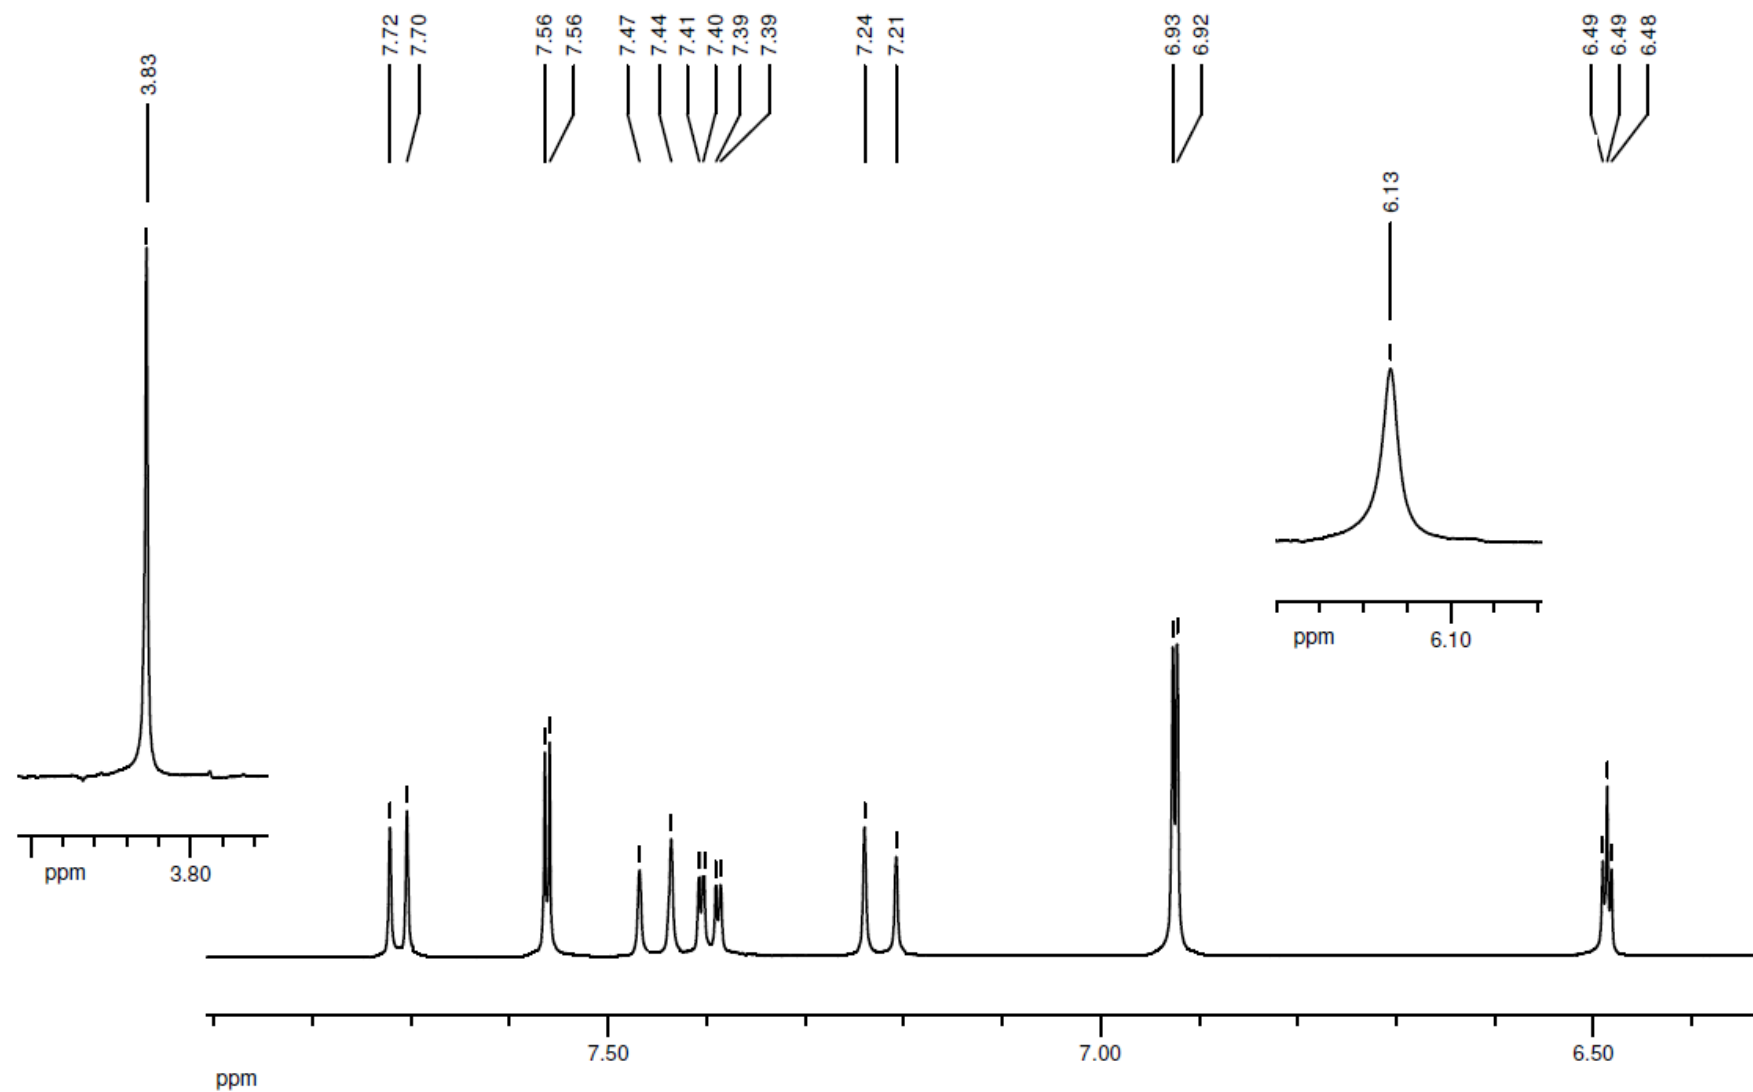



$^{13}\text{C}$  spectrum of (**6b**)

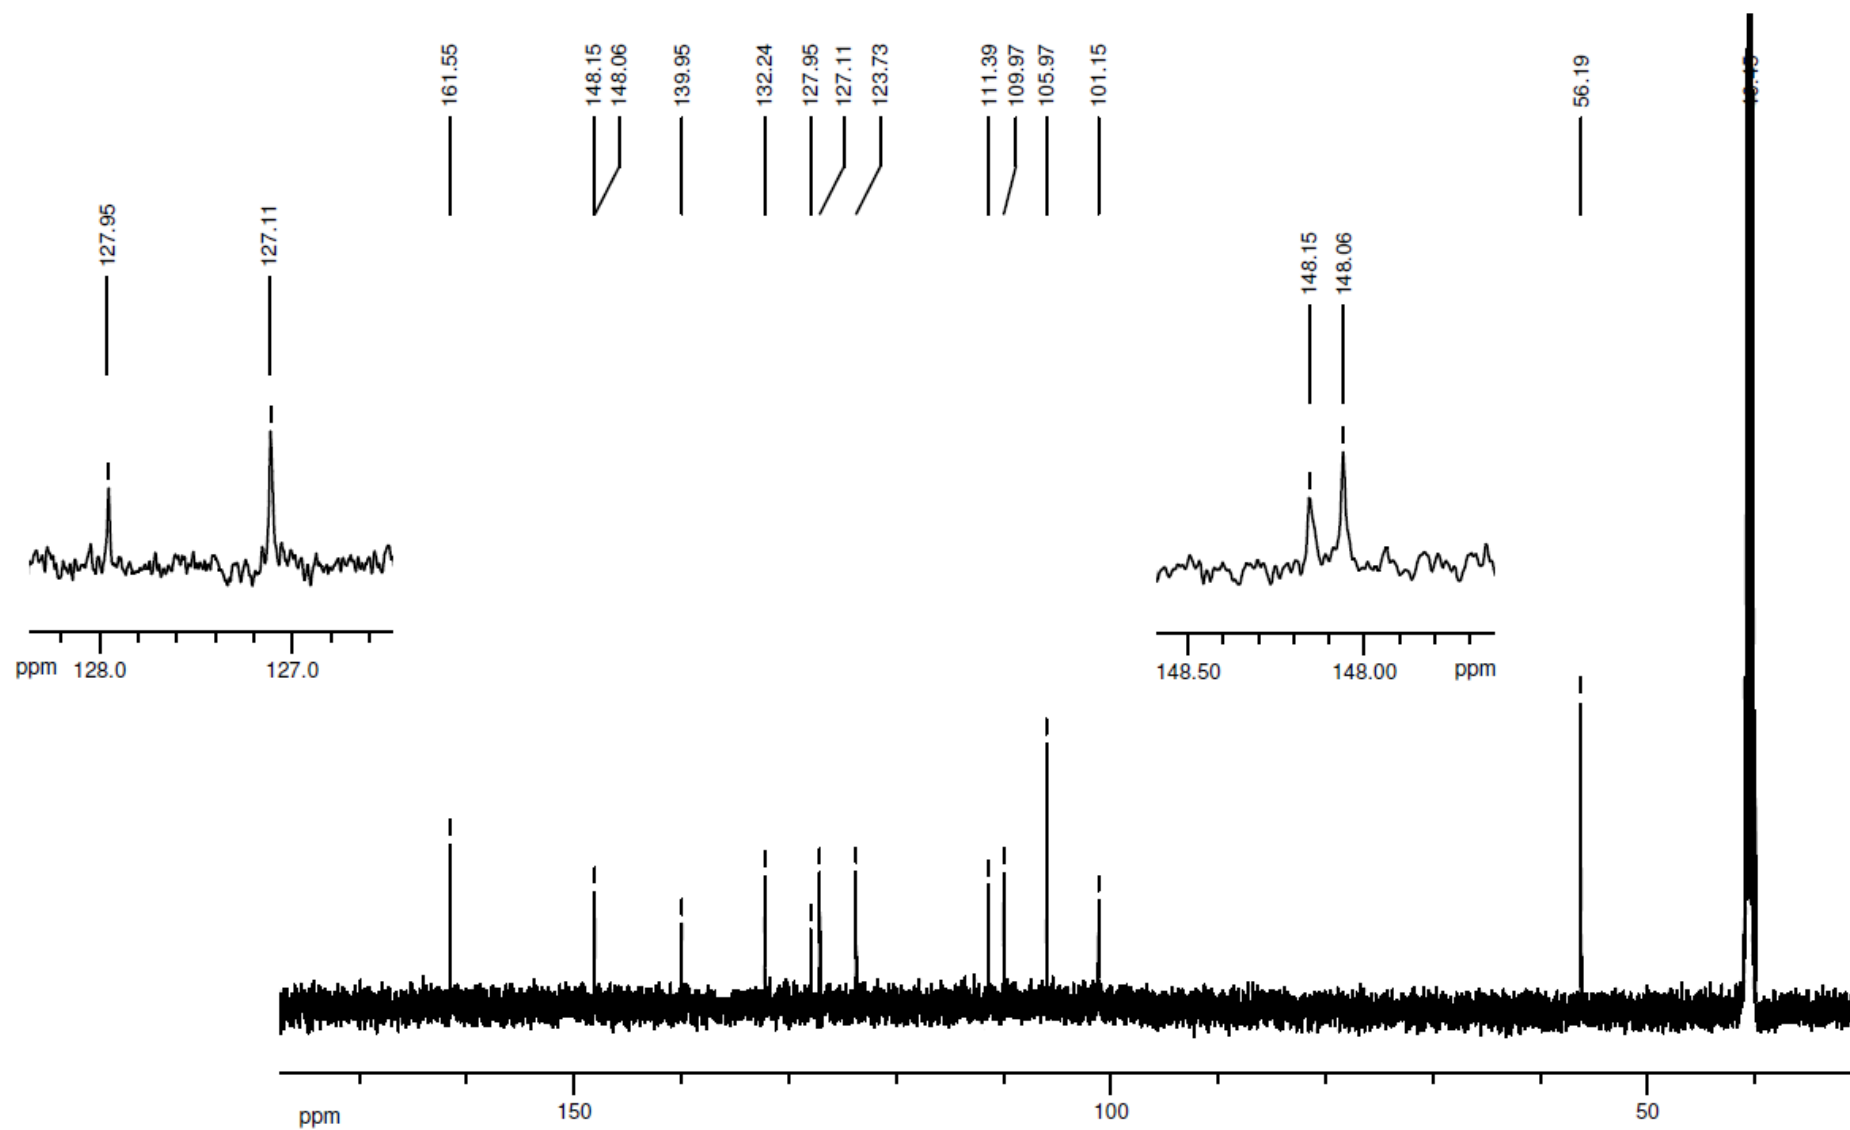

Proton spectrum of (7b)

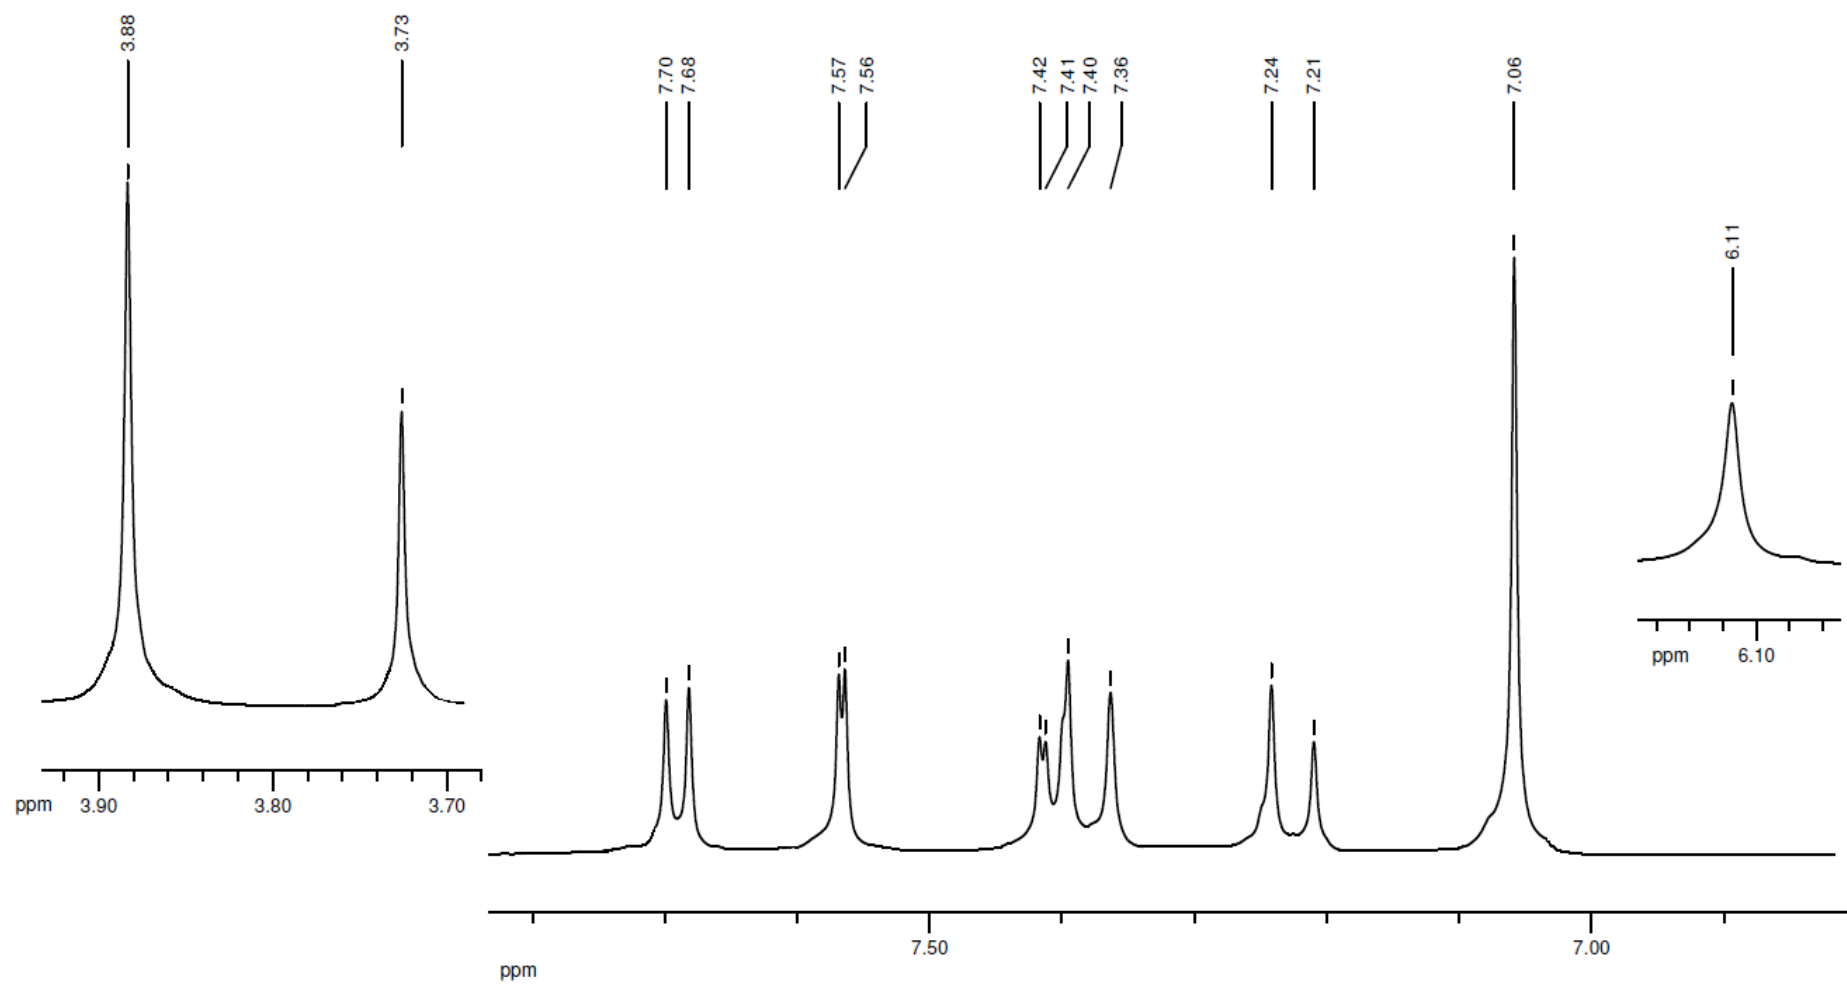

$^{13}\text{C}$  spectrum of (**7b**)

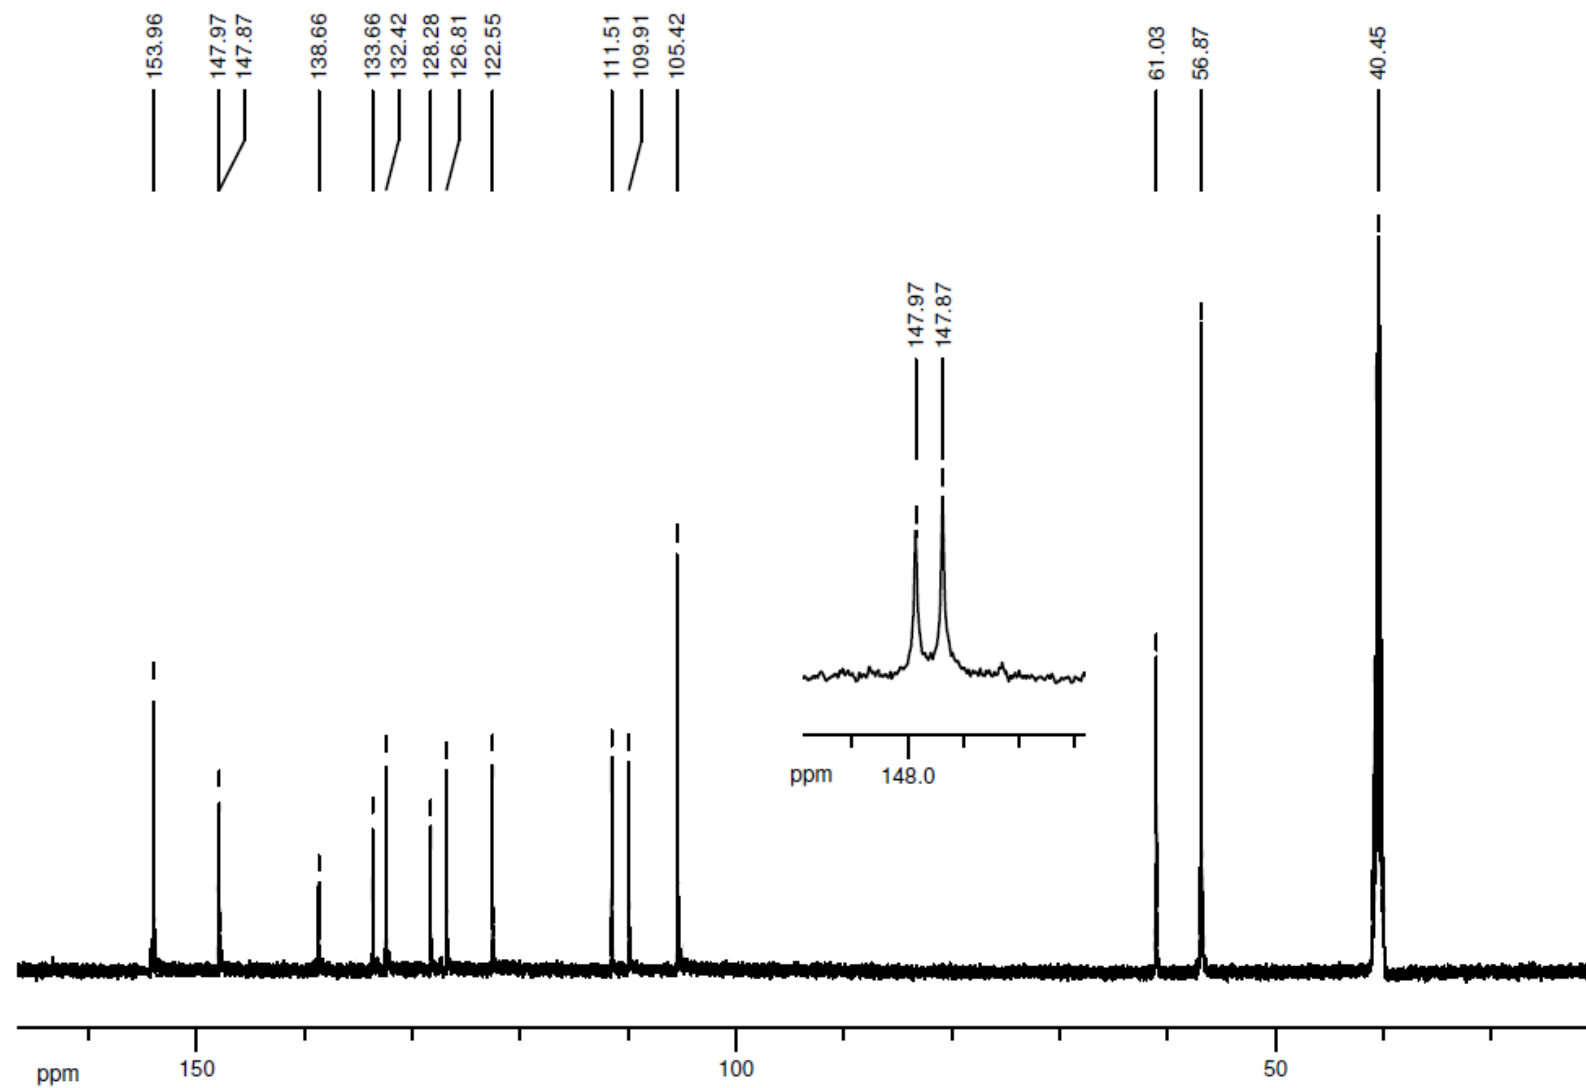

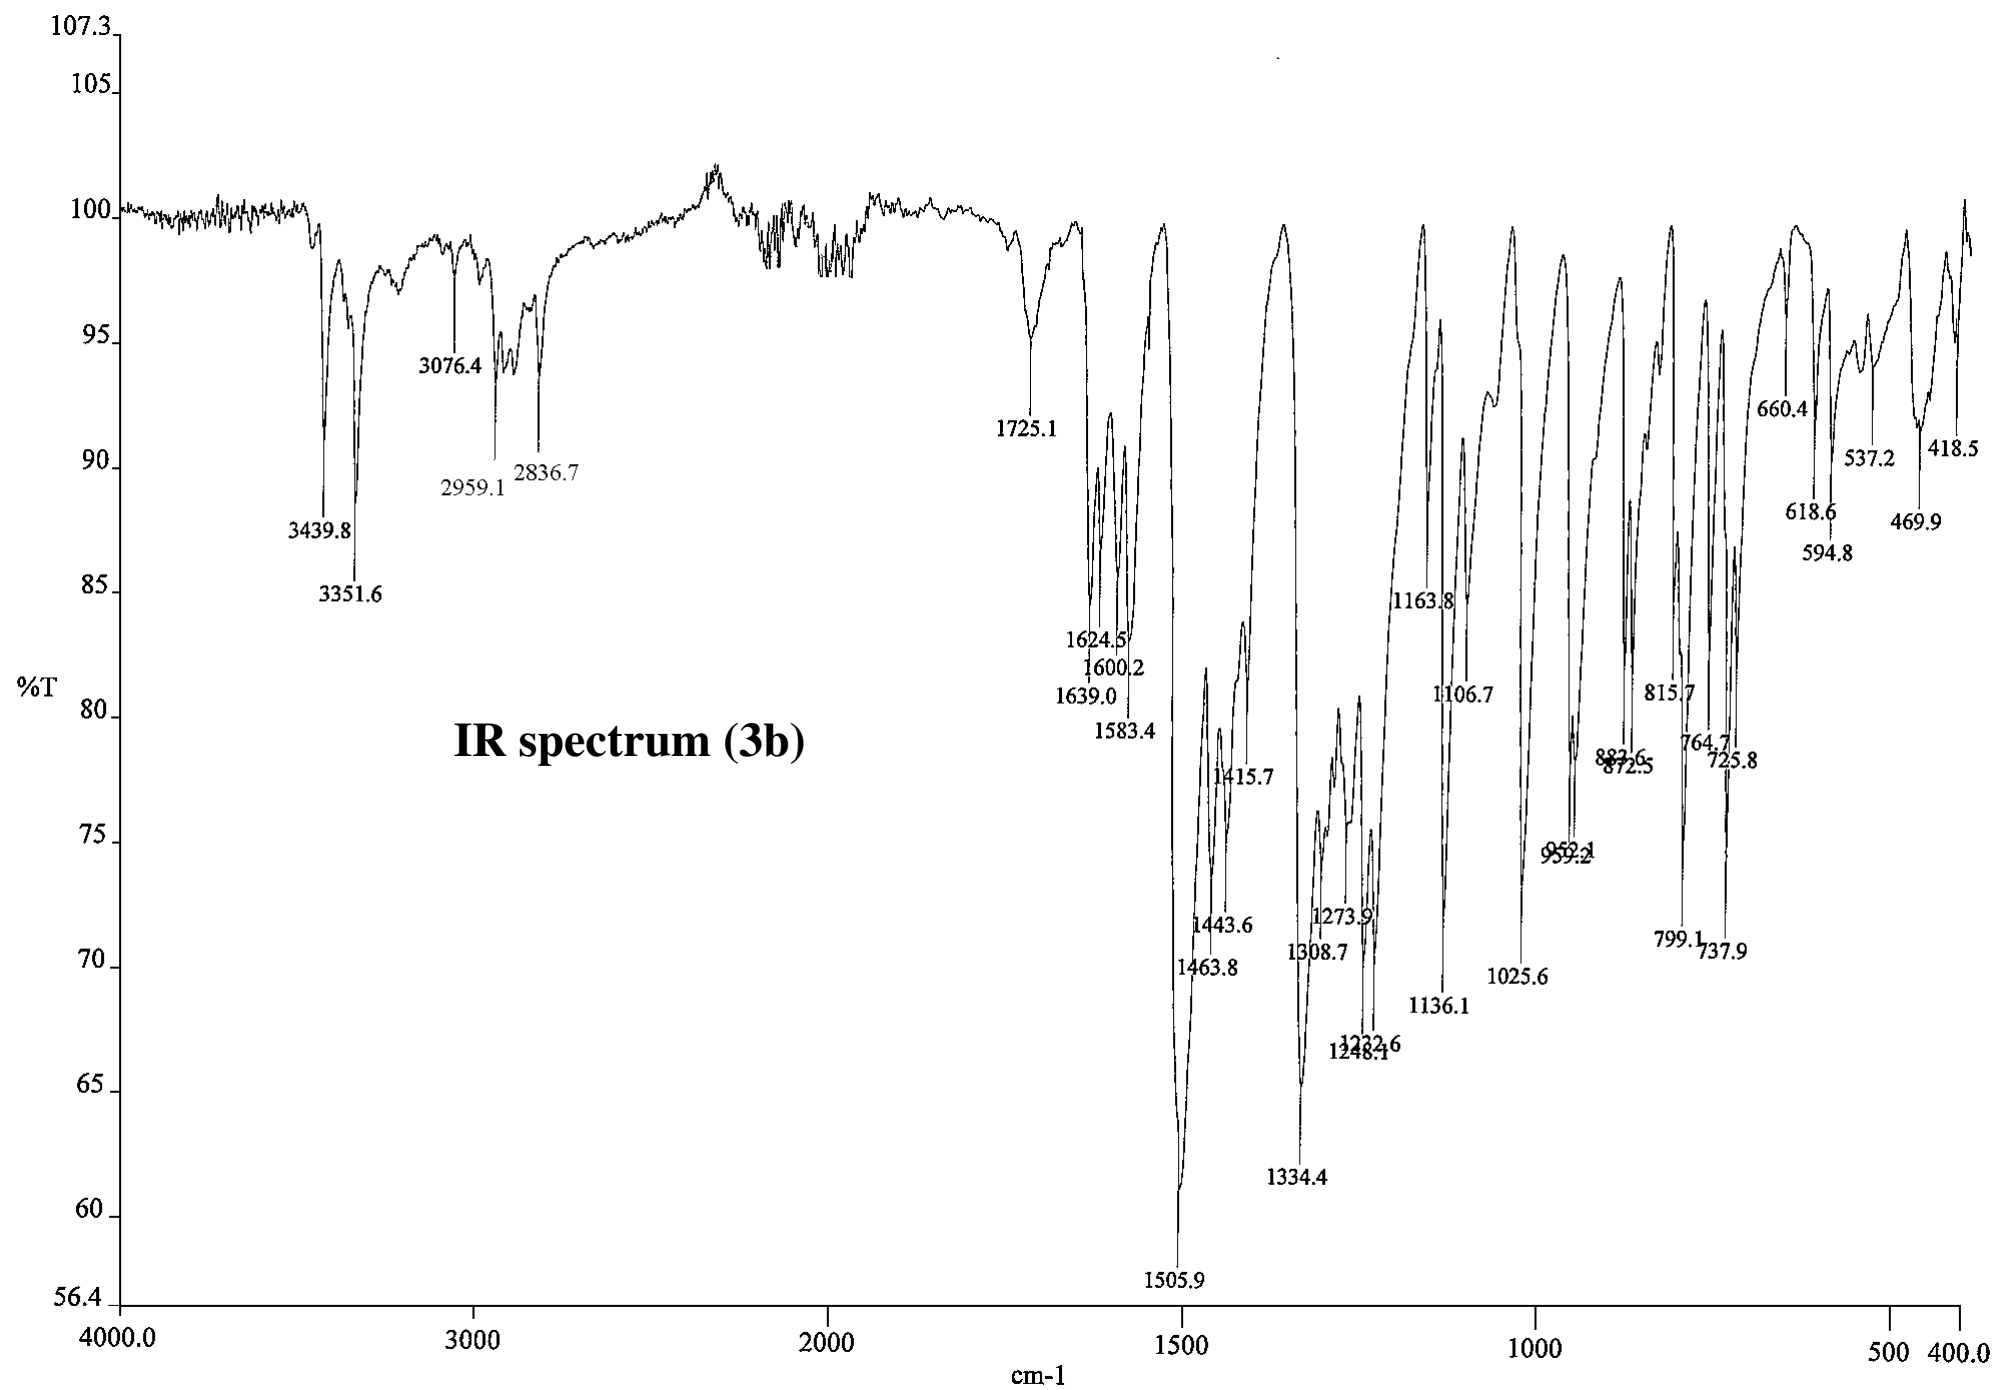

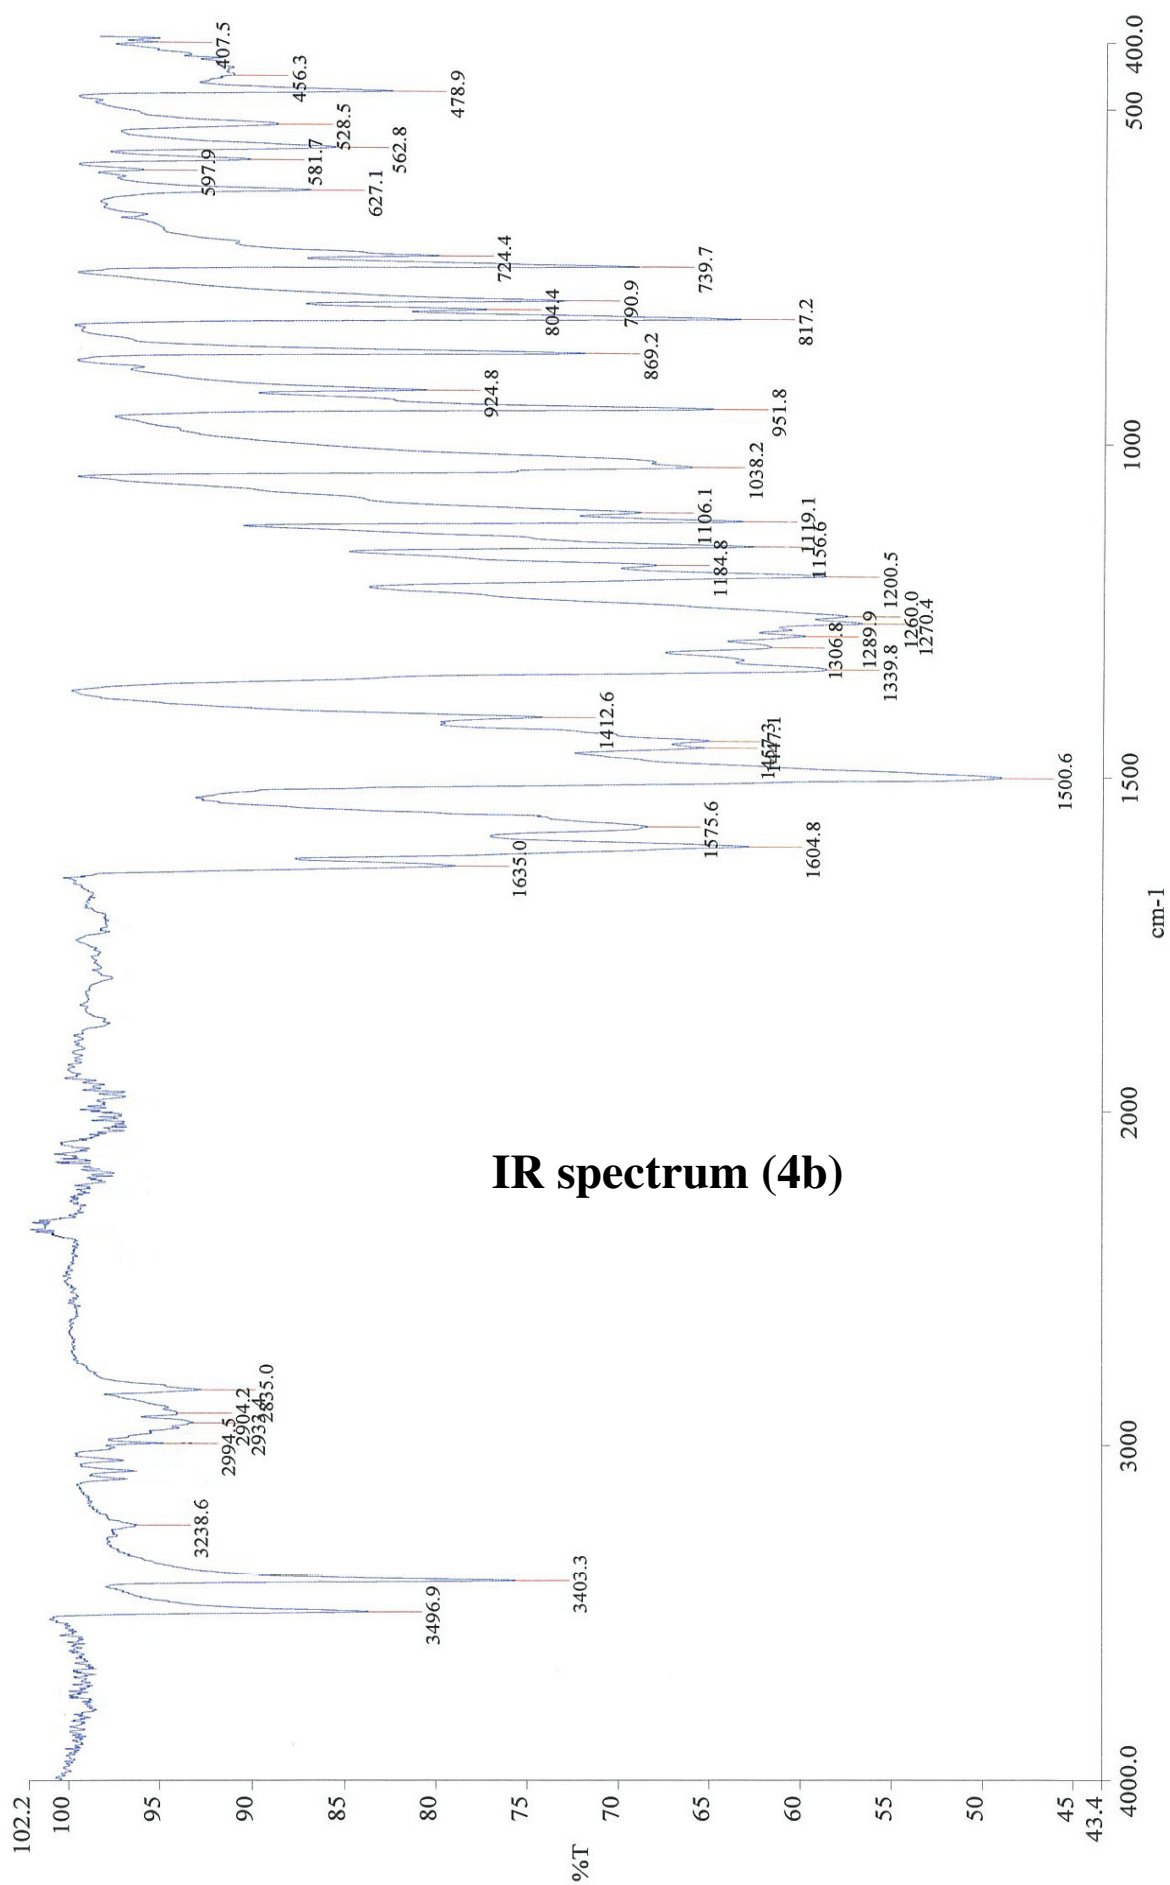

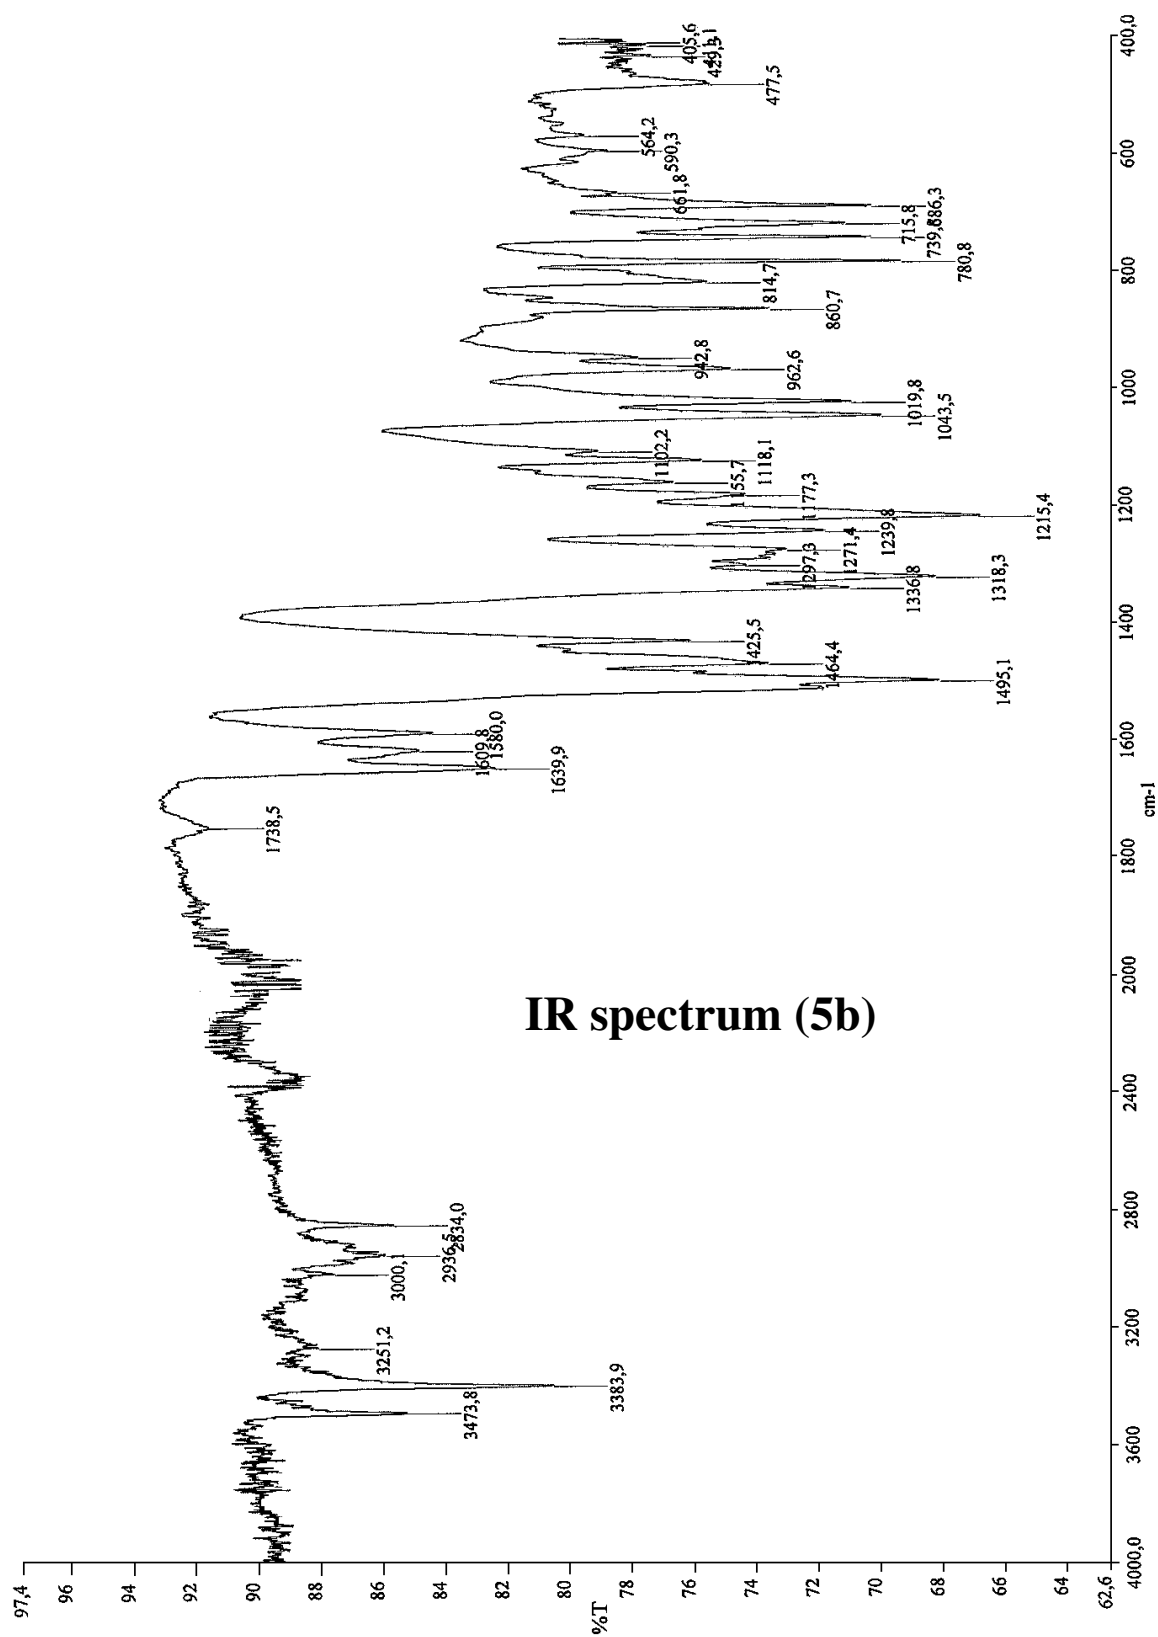

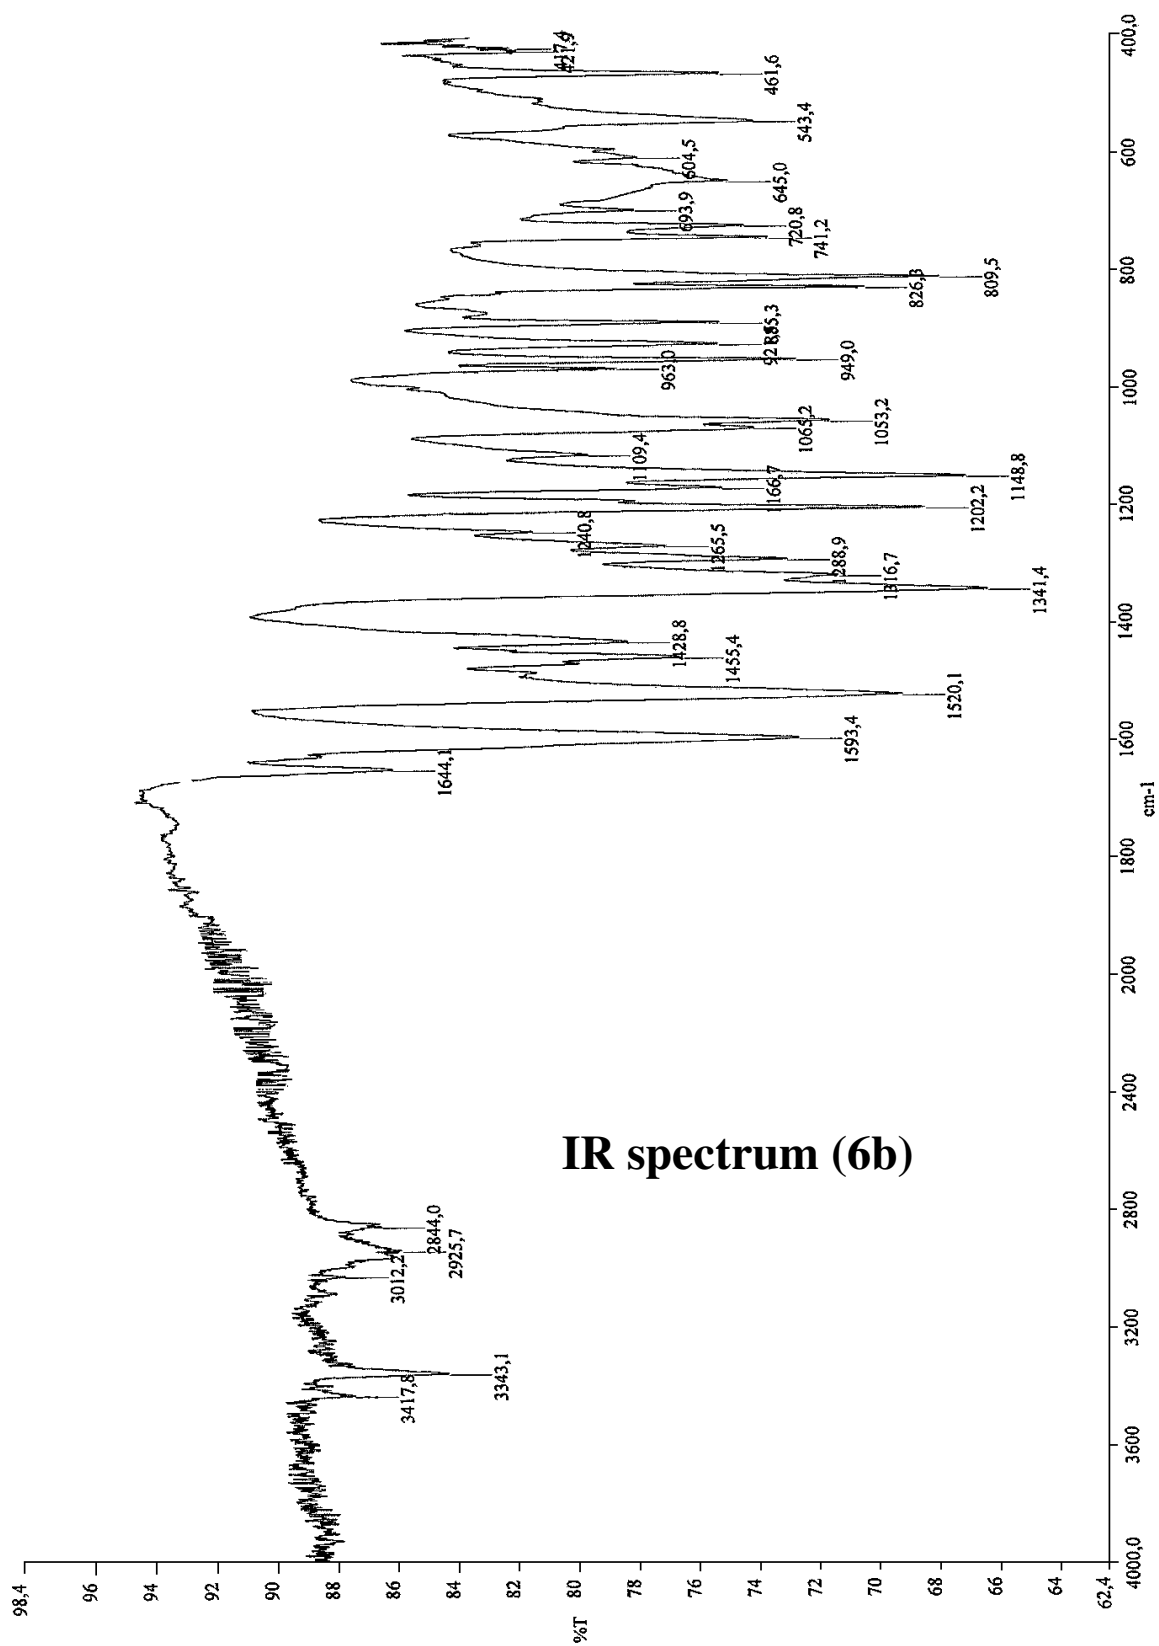

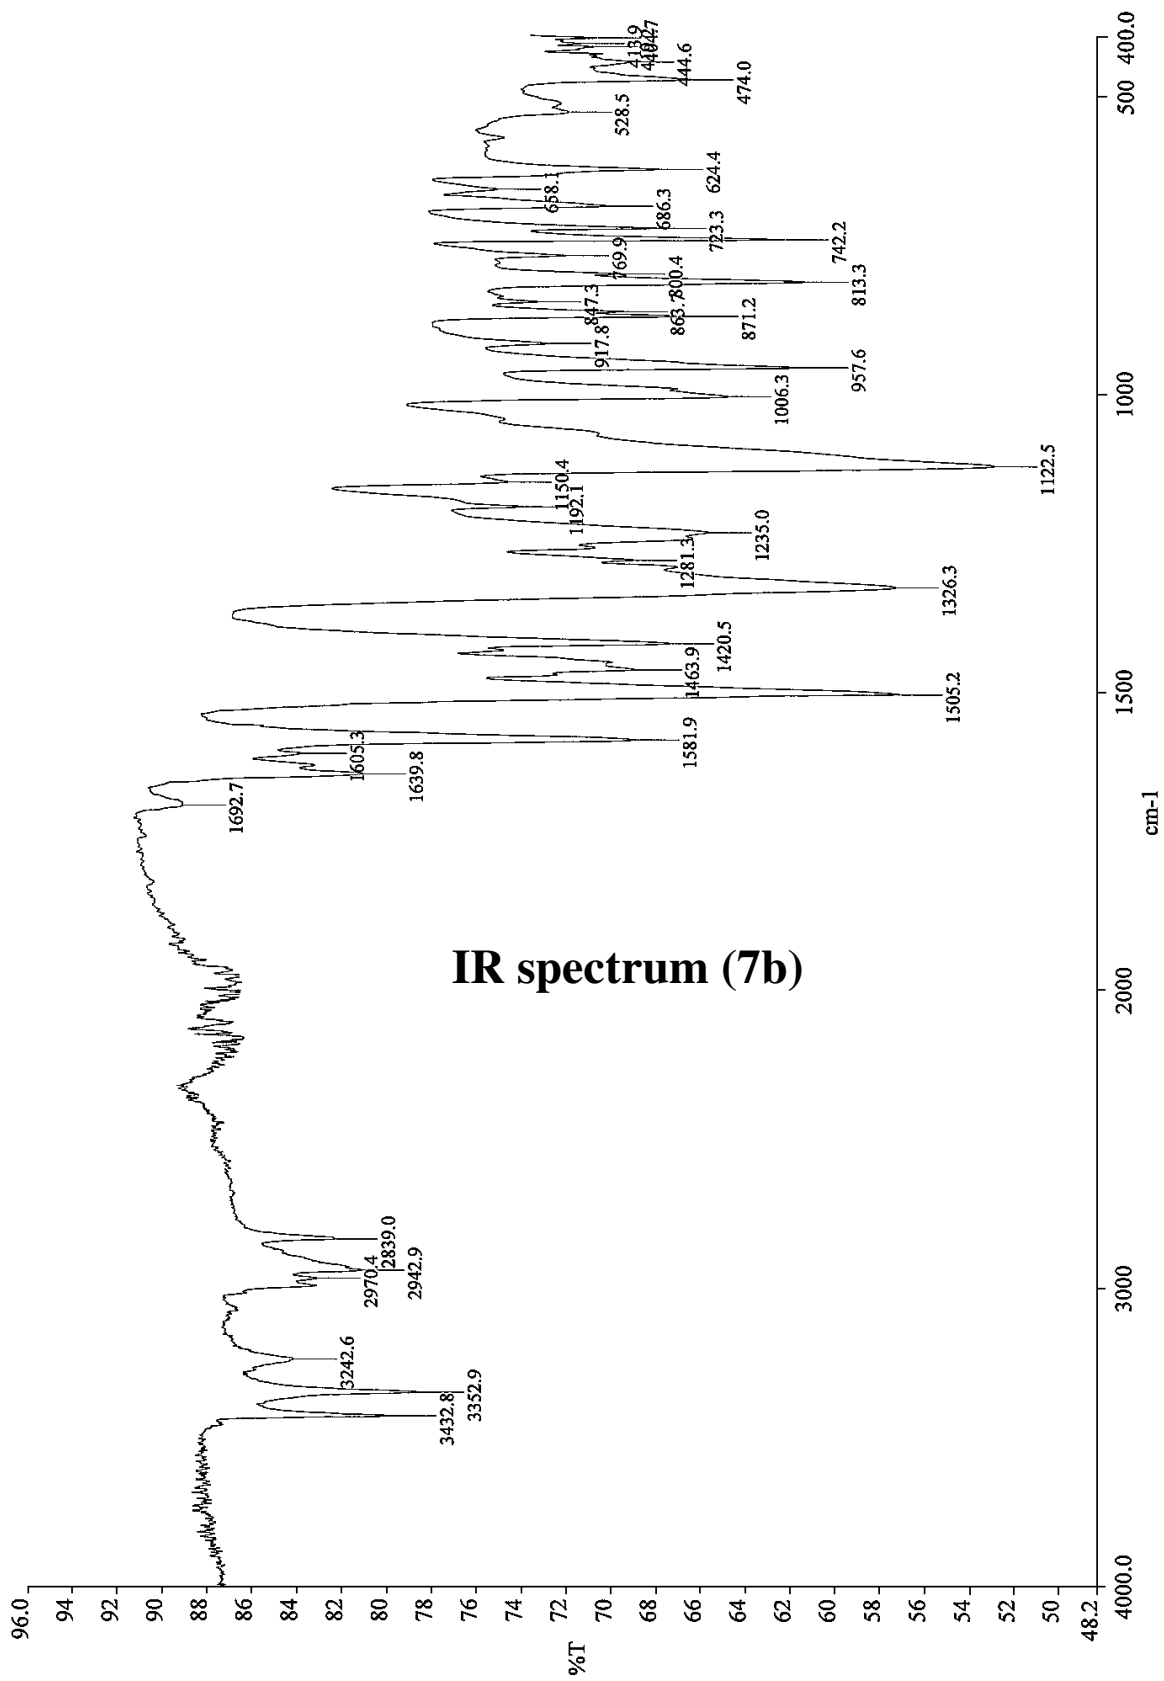

Supplement: f1 [file 320895.f1.pdf]
